# Supplementary material for: Temporal Integration of Serum Proteomics, Metabolomics and MRI Tumor Volumetrics via Deep Learning Identifies Systemic Mediators of Glioblastoma Response to Chemoradiotherapy
Source: Research Square preprint supplement (doi:10.21203/rs.3.rs-9085743/v1), 2026-03-18
Supplement: Supplementary file 2 [file 63280c853cfb62d88a14ff61.xlsx]

## Sheet: README
	grey cell in Supplementary file 4 indicates a metabolite without biological annotation
all identified metabolites are listed with KEGG ID and biological annotation in the "Identified metabolites" tab

## Sheet: Supplementary file 4
Oncogenic action of 2-Hydroxyglutarate					Glutamate metabolism					Citric acid cycle
Feature	GIS	data			Feature	GIS	data			Feature	GIS	data
Fumaric acid	1	metab_PostMinusPre			L-aspartic acid	1	metab_PostMinusPre			Fumaric acid	1	metab_PostMinusPre
2-Hydroxyglutarate	0.940648	metab_PostMinusPre			gamma-Aminobutyric acid	0.336631	metab_PostMinusPre			Citric acid	0.909611	metab_PostMinusPre
Citric acid	0.879899	metab_PostMinusPre			GAD1	-0.0677407	Prot_PostMinusPre			MPC1	0.747473	Prot_PostMinusPre
MPC1	0.742365	Prot_PostMinusPre			GLUD1	-0.128978	Prot_PostMinusPre			PDHB	0.622107	Prot_PostMinusPre
PDHB	0.643385	Prot_PostMinusPre			Glycine	-0.150917	metab_PostMinusPre			MDH2	0.613247	Prot_PostMinusPre
Succinic acid	0.536366	metab_PostMinusPre			GFPT1	-0.213537	Prot_PostMinusPre			IDH3G	0.589851	Prot_PostMinusPre
MDH2	0.516795	Prot_PostMinusPre			ALDH5A1	-0.250193	Prot_PostMinusPre			Succinic acid	0.582083	metab_PostMinusPre
FH	0.484888	Prot_PostMinusPre			Succinic acid	-0.352831	metab_PostMinusPre			FH	0.555153	Prot_PostMinusPre
IDH3G	0.478082	Prot_PostMinusPre			GCLM	-0.48	Prot_PostMinusPre			CS	0.534011	Prot_PostMinusPre
DLAT	0.4743	Prot_PostMinusPre			GOT2	-0.571304	Prot_PostMinusPre			DLD	0.507138	Prot_PostMinusPre
ACO1	0.45844	Prot_PostMinusPre			GNPNAT1	-0.583729	Prot_PostMinusPre			SDHB	0.501253	Prot_PostMinusPre
CS	0.456915	Prot_PostMinusPre			GMPS	-0.658183	Prot_PostMinusPre			DLST	0.499544	Prot_PostMinusPre
IDH1	0.444543	Prot_PostMinusPre			GSR	-0.681909	Prot_PostMinusPre			PC	0.495575	Prot_PostMinusPre
SDHB	0.426081	Prot_PostMinusPre			NAGK	-0.753862	Prot_PostMinusPre			DLAT	0.491869	Prot_PostMinusPre
PC	0.417526	Prot_PostMinusPre			GSS	-0.790433	Prot_PostMinusPre
DLD	0.412922	Prot_PostMinusPre			GPT	-0.842629	Prot_PostMinusPre
DLST	0.404672	Prot_PostMinusPre
Pyrimidine metabolism					Purine metabolism					Warburg effect
Feature	GIS	data			Feature	GIS	data			Feature	GIS	data
dCMP	1	metab_PostMinusPre			HPRT1	1.3466	Prot_PostMinusPre			Fumaric acid	1	metab_PostMinusPre
Orotic acid	0.927184	metab_PostMinusPre			ATIC	1.33216	Prot_PostMinusPre			Citric acid	0.980014	metab_PostMinusPre
C00299	0.882735	metab_PostMinusPre			PAICS	1.32671	Prot_PostMinusPre			MPC1	0.936632	Prot_PostMinusPre
beta-Alanine	0.483295	metab_PostMinusPre			GDA	1.2989	Prot_PostMinusPre			Lactic acid	0.933357	metab_PostMinusPre
UPP2	0.482651	Prot_PostMinusPre			NUDT5	1.29474	Prot_PostMinusPre			TALDO1	0.90414	Prot_PostMinusPre
NT5C2	0.395003	Prot_PostMinusPre			PNP	1.29444	Prot_PostMinusPre			ACO1	0.891753	Prot_PostMinusPre
CANT1	0.387939	Prot_PostMinusPre			IMPDH1	1.29098	Prot_PostMinusPre			PGK1	0.890034	Prot_PostMinusPre
TYMS	0.362884	Prot_PostMinusPre			GMPS	1.28541	Prot_PostMinusPre			PGAM2	0.888718	Prot_PostMinusPre
GDA	0.332843	Prot_PostMinusPre			APRT	1.28355	Prot_PostMinusPre			GLUD1	0.882111	Prot_PostMinusPre
Ureidopropionic acid	0.326966	metab_PostMinusPre			RRM1	1.27605	Prot_PostMinusPre			PKLR	0.882075	Prot_PostMinusPre
DCTD	0.293199	Prot_PostMinusPre			Guanine	1.26634	metab_PostMinusPre			TKT	0.881664	Prot_PostMinusPre
UPB1	0.243386	Prot_PostMinusPre			AK1	1.26216	Prot_PostMinusPre			Succinic acid	0.881234	metab_PostMinusPre
DHODH	0.16456	Prot_PostMinusPre			GMPR	1.25917	Prot_PostMinusPre			MDH1	0.879574	Prot_PostMinusPre
TYMP	0.0532455	Prot_PostMinusPre			NT5C2	1.25735	Prot_PostMinusPre			HK2	0.879225	Prot_PostMinusPre
CDA	0.0460987	Prot_PostMinusPre			NUDT2	1.25226	Prot_PostMinusPre			IDH3G	0.878623	Prot_PostMinusPre
CTPS1	-0.0117677	Prot_PostMinusPre			ADSL	1.24799	Prot_PostMinusPre			IDH1	0.878137	Prot_PostMinusPre
DUT	-0.069187	Prot_PostMinusPre			PDE4D	1.24686	Prot_PostMinusPre			GPI	0.875717	Prot_PostMinusPre
DPYS	-0.0947599	Prot_PostMinusPre			TXN	1.24657	Prot_PostMinusPre			CS	0.873193	Prot_PostMinusPre
ITPA	-0.110783	Prot_PostMinusPre			ATAD1	1.24604	Prot_PostMinusPre			FH	0.871869	Prot_PostMinusPre
Deoxyuridine	-0.115695	metab_PostMinusPre			GUK1	1.23826	Prot_PostMinusPre			PKM	0.871741	Prot_PostMinusPre
RRM2	-0.115896	Prot_PostMinusPre			XDH	1.22265	Prot_PostMinusPre			DLST	0.86896	Prot_PostMinusPre
RRM2B	-0.13682	Prot_PostMinusPre			Glycine	1.21065	metab_PostMinusPre			PGLS	0.868533	Prot_PostMinusPre
TK1	-0.21779	Prot_PostMinusPre			ITPA	1.19599	Prot_PostMinusPre			G6PD	0.867581	Prot_PostMinusPre
					Adenine	1.19264	metab_PostMinusPre			ENO1	0.867016	Prot_PostMinusPre
					RRM2	1.18923	Prot_PostMinusPre			DLD	0.865709	Prot_PostMinusPre
					ADA	1.17617	Prot_PostMinusPre			ALDOB	0.863245	Prot_PostMinusPre
					Uric acid	1.17588	metab_PostMinusPre			PC	0.859088	Prot_PostMinusPre
					ENTPD5	1.15772	Prot_PostMinusPre			RPIA	0.854607	Prot_PostMinusPre
					Xantine	1.10312	metab_PostMinusPre			PGD	0.853169	Prot_PostMinusPre
					Guanosine	1.09266	metab_PostMinusPre			PDHB	0.846701	Prot_PostMinusPre
					Hypoxanthine	1.07937	metab_PostMinusPre			DLAT	0.843353	Prot_PostMinusPre
					Inosine	1.05222	metab_PostMinusPre			SDHB	0.83926	Prot_PostMinusPre
					Fumaric acid	1.04822	metab_PostMinusPre			GAPDH	0.834366	Prot_PostMinusPre
					Xanthosine	1.04307	metab_PostMinusPre
					L-aspartic acid	1	metab_PostMinusPre
Propanoate Metabolism					Phenylalanine and Tyrosine					Fructose and Mannose degradation
Feature	GIS	data			Feature	GIS	data			Feature	GIS	data
Citric acid	1	metab_PostMinusPre			Fumaric acid	1	metab_PostMinusPre			Glyceraldehyde	1	metab_PostMinusPre
MCEE	0.404795	Prot_PostMinusPre			Phenylpyruvic acid	0.622535	metab_PostMinusPre			MPI	0.801805	Prot_PostMinusPre
beta-Alanine	0.363011	metab_PostMinusPre			Acetoacetic acid	0.56781	metab_PostMinusPre			GMDS	0.794929	Prot_PostMinusPre
HIBCH	0.25431	Prot_PostMinusPre			GSTZ1	0.553692	Prot_PostMinusPre			ALDOA	0.775478	Prot_PostMinusPre
ACAT1	0.152215	Prot_PostMinusPre			HGD	0.535722	Prot_PostMinusPre			PFKFB1	0.739054	Prot_PostMinusPre
ECHS1	0.0875176	Prot_PostMinusPre			FAH	0.519141	Prot_PostMinusPre			TPI1	0.730599	Prot_PostMinusPre
ALDH6A1	-0.00437754	Prot_PostMinusPre			TAT	0.492148	Prot_PostMinusPre			PHPT1	0.71584	Prot_PostMinusPre
ACADM	-0.00922852	Prot_PostMinusPre			GOT1	0.473557	Prot_PostMinusPre			KHK	0.68451	Prot_PostMinusPre
MLYCD	-0.0111896	Prot_PostMinusPre			HPD	0.400307	Prot_PostMinusPre			SORD	0.683212	Prot_PostMinusPre
ACSS3	-0.0218234	Prot_PostMinusPre			IL4I1	0.340102	Prot_PostMinusPre			FBP1	0.680791	Prot_PostMinusPre
DLD	-0.0666407	Prot_PostMinusPre								PMM1	0.67022	Prot_PostMinusPre
DBT	-0.184385	Prot_PostMinusPre								ALDOB	0.668878	Prot_PostMinusPre
										AKR1B1	0.655351	Prot_PostMinusPre
										HK1	0.598926	Prot_PostMinusPre
G(M2)-Gangliosidosis					Gluconeogenesis					The Oncogenic action of L-2-Hydroxyglutarate in hydroxyglutaric aciduria
Feature	GIS	data			Feature	GIS	data			Feature	GIS	data
ST3GAL1	1	Prot_PostMinusPre			C00711	1	metab_PostMinusPre			Fumaric acid	1	metab_PostMinusPre
B4GALNT1	0.899775	Prot_PostMinusPre			Lactic acid	0.799315	metab_PostMinusPre			2-Hydroxyglutarate	0.93985	metab_PostMinusPre
ST6GALNAC6	0.887067	Prot_PostMinusPre			MPC1	0.779068	Prot_PostMinusPre			Citric acid	0.866055	metab_PostMinusPre
ST6GALNAC4	0.808225	Prot_PostMinusPre			MDH2	0.714945	Prot_PostMinusPre			MPC1	0.763235	Prot_PostMinusPre
C01074	0.591289	metab_PostMinusPre			PGAM2	0.679556	Prot_PostMinusPre			GLUD1	0.617033	Prot_PostMinusPre
HEXB	0.531289	Prot_PostMinusPre			PGM1	0.672456	Prot_PostMinusPre			PDHB	0.582015	Prot_PostMinusPre
ST3GAL5	0.368717	Prot_PostMinusPre			BPGM	0.663161	Prot_PostMinusPre			Succinic acid	0.496117	metab_PostMinusPre
GLB1	0.278652	Prot_PostMinusPre			GPI	0.652349	Prot_PostMinusPre			DLAT	0.429029	Prot_PostMinusPre
HEXA	0.245175	Prot_PostMinusPre			TPI1	0.648947	Prot_PostMinusPre			MDH2	0.421367	Prot_PostMinusPre
ST8SIA1	0.196547	Prot_PostMinusPre			HK2	0.646281	Prot_PostMinusPre			FH	0.381146	Prot_PostMinusPre
					FBP1	0.646105	Prot_PostMinusPre			IDH3G	0.371922	Prot_PostMinusPre
					PGAM1	0.638636	Prot_PostMinusPre			ACO1	0.358753	Prot_PostMinusPre
					ALDOA	0.629215	Prot_PostMinusPre			CS	0.351042	Prot_PostMinusPre
					ENO1	0.614266	Prot_PostMinusPre			IDH1	0.349828	Prot_PostMinusPre
					PC	0.595725	Prot_PostMinusPre			DLST	0.329104	Prot_PostMinusPre
					PANK1	0.573593	Prot_PostMinusPre			PC	0.323746	Prot_PostMinusPre
					GAPDH	0.527849	Prot_PostMinusPre			DLD	0.305987	Prot_PostMinusPre
					PCK1	0.505829	Prot_PostMinusPre			SDHB	0.304062	Prot_PostMinusPre
Urea cycle					Ammonia recycling					Beta-alanine metabolism
Feature	GIS	data			Feature	GIS	data			Feature	GIS	data
L-aspartic acid	1	metab_PostMinusPre			Histidine	1	metab_PostMinusPre			beta-Alanine	7.61415	metab_PostMinusPre
Fumaric acid	0.830343	metab_PostMinusPre			ASRGL1	0.573099	Prot_PostMinusPre			GAD1	7.57053	Prot_PostMinusPre
L-Arginine	0.405238	metab_PostMinusPre			GLUD1	0.193076	Prot_PostMinusPre			1-Methylhistidine	6.49152	metab_PostMinusPre
Citrulline	0.150193	metab_PostMinusPre			L-aspartic acid	0.0796107	metab_PostMinusPre			Carnosine	6.24423	metab_PostMinusPre
GLUD1	0.127926	Prot_PostMinusPre			Glycine	0.0434326	metab_PostMinusPre			Ureidopropionic acid	6.16781	metab_PostMinusPre
ARG1	-0.158119	Prot_PostMinusPre			AMT	-0.0607145	Prot_PostMinusPre			UPB1	4.94476	Prot_PostMinusPre
OTC	-0.386992	Prot_PostMinusPre			Urocanic acid	-0.110529	metab_PostMinusPre			AOC3	4.08019	Prot_PostMinusPre
GOT2	-0.493253	Prot_PostMinusPre			DLD	-0.148269	Prot_PostMinusPre			CNDP1	3.83281	Prot_PostMinusPre
GPT	-0.523948	Prot_PostMinusPre			ASNS	-0.817508	Prot_PostMinusPre			DPYS	3.12277	Prot_PostMinusPre
ASL	-0.746493	Prot_PostMinusPre			GCSH	-0.826365	Prot_PostMinusPre			L-aspartic acid	2.38315	metab_PostMinusPre
										Histidine	2.36424	metab_PostMinusPre
										ALDH6A1	1.99588	Prot_PostMinusPre
										ALDH2	1.1664	Prot_PostMinusPre
										Pantothenic acid	1	metab_PostMinusPre
Histidine					Aspartate metabolism					Tryptophan metabolism
Feature	GIS	data			Feature	GIS	data			Feature	GIS	data
1-Methylhistidine	11.1926	metab_PostMinusPre			L-aspartic acid	1	metab_PostMinusPre			Indoleacetic acid	1	metab_PostMinusPre
ALDH3A1	10.9363	Prot_PostMinusPre			Fumaric acid	0.681427	metab_PostMinusPre			Kynurenic acid	0.807753	metab_PostMinusPre
CNDP2	10.5623	Prot_PostMinusPre			ADSL	0.201775	Prot_PostMinusPre			3-Hydroxyanthranilic acid	0.372552	metab_PostMinusPre
beta-Alanine	10.4427	metab_PostMinusPre			ASPA	0.195011	Prot_PostMinusPre			N-Acetylserotonin	0.312177	metab_PostMinusPre
PRMT3	10.4331	Prot_PostMinusPre			ASL	0.0390638	Prot_PostMinusPre			DDC	0.28196	Prot_PostMinusPre
CARNMT1	9.40127	Prot_PostMinusPre			ASNS	-0.17326	Prot_PostMinusPre			TDO2	0.224216	Prot_PostMinusPre
Imidazoleacetic acid	8.79905	metab_PostMinusPre			L-Arginine	-0.247043	metab_PostMinusPre			CAT	0.171261	Prot_PostMinusPre
Carnosine	8.54338	metab_PostMinusPre			GAD1	-0.280854	Prot_PostMinusPre			Serotonin	0.15992	metab_PostMinusPre
ALDH2	6.84683	Prot_PostMinusPre			beta-Alanine	-0.409227	metab_PostMinusPre			ALDH2	0.156728	Prot_PostMinusPre
CNDP1	6.48976	Prot_PostMinusPre			C00327	-0.424557	metab_PostMinusPre			TPH1	0.124063	Prot_PostMinusPre
FTCD	6.42678	Prot_PostMinusPre			ASRGL1	-0.531316	Prot_PostMinusPre			Formic acid	0.0865892	metab_PostMinusPre
HNMT	4.79107	Prot_PostMinusPre			IL4I1	-0.707657	Prot_PostMinusPre			AADAT	0.0750507	Prot_PostMinusPre
Urocanic acid	1.48353	metab_PostMinusPre								Tryptamine	0.0716292	metab_PostMinusPre
Histidine	1	metab_PostMinusPre								HAAO	0.0619258	Prot_PostMinusPre
										Quinolinic acid	0.0517024	metab_PostMinusPre
										KMO	0.0516916	Prot_PostMinusPre
										KYNU	0.0454485	Prot_PostMinusPre
										Formylkynurenine	0.0154876	metab_PostMinusPre
										IDO1	-0.00139498	Prot_PostMinusPre
										WARS2	-0.0281968	Prot_PostMinusPre
Glycine and Serine metabolism					The oncogenic action of succinate					Glutaminolysis and cancer
Feature	GIS	data			Feature	GIS	data			Feature	GIS	data
Creatine	4.82871	metab_PostMinusPre			2-Hydroxyglutarate	1	metab_PostMinusPre			L-aspartic acid	1	metab_PostMinusPre
AGXT	4.80446	Prot_PostMinusPre			Proline	0.993697	metab_PostMinusPre			Fumaric acid	0.930185	metab_PostMinusPre
DLD	4.76926	Prot_PostMinusPre			Fumaric acid	0.950104	metab_PostMinusPre			Citric acid	0.873651	metab_PostMinusPre
CTH	4.69665	Prot_PostMinusPre			Citric acid	0.877704	metab_PostMinusPre			MPC1	0.768471	Prot_PostMinusPre
GATM	4.66601	Prot_PostMinusPre			MPC1	0.597792	Prot_PostMinusPre			Lactic acid	0.749699	metab_PostMinusPre
SHMT1	4.58999	Prot_PostMinusPre			4-Hydroxyproline	0.561458	metab_PostMinusPre			MYC	0.700525	Prot_PostMinusPre
PSAT1	4.57417	Prot_PostMinusPre			Succinic acid	0.264869	metab_PostMinusPre			GLUD1	0.635442	Prot_PostMinusPre
GNMT	4.57051	Prot_PostMinusPre			IDH3G	0.23167	Prot_PostMinusPre			Succinic acid	0.596905	metab_PostMinusPre
ALDH2	4.54106	Prot_PostMinusPre			ACO1	0.187611	Prot_PostMinusPre			HIF1AN	0.588992	Prot_PostMinusPre
PHGDH	4.5294	Prot_PostMinusPre			MDH2	0.174803	Prot_PostMinusPre			ACLY	0.573298	Prot_PostMinusPre
CBS	4.43631	Prot_PostMinusPre			HIF1A	0.151481	Prot_PostMinusPre			PDHB	0.56048	Prot_PostMinusPre
AMT	4.43316	Prot_PostMinusPre			DLST	0.0980294	Prot_PostMinusPre			GOT2	0.548755	Prot_PostMinusPre
SHMT2	4.43221	Prot_PostMinusPre			PDHB	0.0956909	Prot_PostMinusPre			MDH2	0.544754	Prot_PostMinusPre
5-Aminolevulinic acid	4.38744	metab_PostMinusPre			IDH1	0.0855357	Prot_PostMinusPre			IDH3G	0.542082	Prot_PostMinusPre
Glycine	4.31152	metab_PostMinusPre			EGLN3	0.0471916	Prot_PostMinusPre			DLST	0.499124	Prot_PostMinusPre
Guanidoacetic acid	3.87572	metab_PostMinusPre			EGLN2	0.0471369	Prot_PostMinusPre			MYCBP	0.487137	Prot_PostMinusPre
Betaine	3.16969	metab_PostMinusPre			FH	0.000356968	Prot_PostMinusPre			FH	0.482639	Prot_PostMinusPre
PSPH	3.1085	Prot_PostMinusPre			DLD	-0.00956517	Prot_PostMinusPre			DLAT	0.48257	Prot_PostMinusPre
C05330	3.10845	metab_PostMinusPre			PC	-0.0234743	Prot_PostMinusPre			LDHA	0.479538	Prot_PostMinusPre
L-Arginine	3.0778	metab_PostMinusPre			CS	-0.0411044	Prot_PostMinusPre			CS	0.462995	Prot_PostMinusPre
Glyceric acid	1	metab_PostMinusPre			DLAT	-0.0530857	Prot_PostMinusPre			PC	0.461354	Prot_PostMinusPre
					SDHB	-0.103358	Prot_PostMinusPre			DLD	0.458837	Prot_PostMinusPre
					EGLN1	-0.131076	Prot_PostMinusPre			SDHB	0.425512	Prot_PostMinusPre
										ME1	0.411824	Prot_PostMinusPre
The oncogenic action of fumarate					Disulfiram Action Pathway					Tyrosine Metabolism
Feature	GIS	data			Feature	GIS	data			Feature	GIS	data
2-Hydroxyglutarate	1	metab_PostMinusPre			L-aspartic acid	1	metab_PostMinusPre			Fumaric acid	1	metab_PostMinusPre
Proline	0.929115	metab_PostMinusPre			Fumaric acid	0.998335	metab_PostMinusPre			L-aspartic acid	0.986292	metab_PostMinusPre
Fumaric acid	0.859737	metab_PostMinusPre			p-Hydroxyphenylacetic acid	0.992032	metab_PostMinusPre			Hydroxyphenylacetic acid	0.977938	metab_PostMinusPre
Citric acid	0.814387	metab_PostMinusPre			C00425	0.949392	metab_PostMinusPre			C00425	0.950457	metab_PostMinusPre
C00711	0.804915	metab_PostMinusPre			DOPA	0.920444	metab_PostMinusPre			DOPA	0.894439	metab_PostMinusPre
MPC1	0.513759	Prot_PostMinusPre			ALDH1B1	0.887994	Prot_PostMinusPre			GOT1	0.894265	Prot_PostMinusPre
4-Hydroxyproline	0.40297	metab_PostMinusPre			GOT1	0.880323	Prot_PostMinusPre			ALDH3A1	0.794455	Prot_PostMinusPre
Succinic acid	0.0115012	metab_PostMinusPre			ALDH3A1	0.852781	Prot_PostMinusPre			PNMT	0.761211	Prot_PostMinusPre
IDH3G	-0.125627	Prot_PostMinusPre			Acetoacetic acid	0.802816	metab_PostMinusPre			MIF	0.744538	Prot_PostMinusPre
ACO1	-0.194736	Prot_PostMinusPre			ADH1B	0.797599	Prot_PostMinusPre			Acetoacetic acid	0.73904	metab_PostMinusPre
HIF1A	-0.219148	Prot_PostMinusPre			MIF	0.792777	Prot_PostMinusPre			HPD	0.734694	Prot_PostMinusPre
MDH2	-0.253285	Prot_PostMinusPre			PNMT	0.788647	Prot_PostMinusPre			TAT	0.72302	Prot_PostMinusPre
DLST	-0.254871	Prot_PostMinusPre			HAAO	0.776421	Prot_PostMinusPre			HAAO	0.709989	Prot_PostMinusPre
IDH1	-0.335354	Prot_PostMinusPre			TAT	0.774319	Prot_PostMinusPre			ADH1A	0.707161	Prot_PostMinusPre
PDHB	-0.341752	Prot_PostMinusPre			HPD	0.771041	Prot_PostMinusPre			DDC	0.705952	Prot_PostMinusPre
EGLN3	-0.354662	Prot_PostMinusPre			ADH1A	0.768339	Prot_PostMinusPre			HGD	0.697446	Prot_PostMinusPre
DLAT	-0.465492	Prot_PostMinusPre			DDC	0.765282	Prot_PostMinusPre			GSTZ1	0.682956	Prot_PostMinusPre
EGLN2	-0.472362	Prot_PostMinusPre			ALDH2	0.762982	Prot_PostMinusPre			FAH	0.661775	Prot_PostMinusPre
PC	-0.482678	Prot_PostMinusPre			CAT	0.748298	Prot_PostMinusPre			DCT	0.649038	Prot_PostMinusPre
DLD	-0.483456	Prot_PostMinusPre			HGD	0.747671	Prot_PostMinusPre			COMT	0.582515	Prot_PostMinusPre
FH	-0.5107	Prot_PostMinusPre			GSTZ1	0.736895	Prot_PostMinusPre
CS	-0.564588	Prot_PostMinusPre			ACSS2	0.732635	Prot_PostMinusPre
SDHB	-0.655609	Prot_PostMinusPre			DCT	0.729268	Prot_PostMinusPre
EGLN1	-0.712985	Prot_PostMinusPre			FAH	0.721905	Prot_PostMinusPre
					COMT	0.677003	Prot_PostMinusPre
Azathioprine Action Pathway
Feature	GIS	data
TPMT	1.48048	Prot_PostMinusPre
GDA	1.46284	Prot_PostMinusPre
HPRT1	1.45359	Prot_PostMinusPre
RAC1	1.45261	Prot_PostMinusPre
PAICS	1.44251	Prot_PostMinusPre
ATIC	1.43503	Prot_PostMinusPre
PNP	1.40202	Prot_PostMinusPre
IMPDH1	1.39364	Prot_PostMinusPre
Guanine	1.39356	metab_PostMinusPre
NUDT5	1.38501	Prot_PostMinusPre
NT5C2	1.38041	Prot_PostMinusPre
APRT	1.37257	Prot_PostMinusPre
GMPS	1.36598	Prot_PostMinusPre
RRM1	1.3659	Prot_PostMinusPre
GMPR	1.3633	Prot_PostMinusPre
AK1	1.35939	Prot_PostMinusPre
PDE4D	1.34533	Prot_PostMinusPre
NUDT2	1.34486	Prot_PostMinusPre
ADSL	1.33654	Prot_PostMinusPre
ATAD1	1.33597	Prot_PostMinusPre
ADK	1.33471	Prot_PostMinusPre
TXN	1.33417	Prot_PostMinusPre
GUK1	1.32392	Prot_PostMinusPre
XDH	1.29595	Prot_PostMinusPre
ADA	1.27842	Prot_PostMinusPre
Glycine	1.2776	metab_PostMinusPre
ITPA	1.26235	Prot_PostMinusPre
Adenine	1.25624	metab_PostMinusPre
RRM2	1.25229	Prot_PostMinusPre
Uric acid	1.23201	metab_PostMinusPre
ENTPD5	1.21864	Prot_PostMinusPre
Xantine	1.14588	metab_PostMinusPre
Guanosine	1.13916	metab_PostMinusPre
Hypoxanthine	1.13647	metab_PostMinusPre
Fumaric acid	1.07933	metab_PostMinusPre
Inosine	1.07801	metab_PostMinusPre
Xanthosine	1.06305	metab_PostMinusPre
L-aspartic acid	1	metab_PostMinusPre

## Sheet: Identified metabolites
Query	Match	HMDB	PubChem	KEGG	SMILES	Comment
C00122	Fumaric acid	HMDB0000134	444972	C00122	OC(=O)\C=C\C(O)=O	1
C02630	2-Hydroxyglutarate	HMDB0059655	43	C02630	OC(CCC(O)=O)C(O)=O	1
C00042	Succinic acid	HMDB0000254	1110	C00042	OC(=O)CCC(O)=O	1
C00049	L-Aspartic acid	HMDB0000191	5960	C00049	N[C@@H](CC(O)=O)C(O)=O	1
C00334	gamma-Aminobutyric acid	HMDB0000112	119	C00334	NCCCC(O)=O	1
C00037	Glycine	HMDB0000123	750	C00037	NCC(O)=O	1
C00158	Citric acid	HMDB0000094	311	C00158	OC(=O)CC(O)(CC(O)=O)C(O)=O	1
C00239	dCMP	HMDB0001202	13945	C00239	NC1=NC(=O)N(C=C1)[C@H]1C[C@H](O)[C@@H](COP(O)(O)=O)O1	1
C00295	Orotic acid	HMDB0000226	967	C00295	OC(=O)C1=CC(=O)NC(=O)N1	1
C00099	beta-Alanine	HMDB0000056	239	C00099	NCCC(O)=O	1
C02642	Ureidopropionic acid	HMDB0000026	111	C02642	NC(=O)NCCC(O)=O	1
C00526	Deoxyuridine	HMDB0000012	13712	C00526	OC[C@H]1O[C@H](C[C@@H]1O)N1C=CC(=O)NC1=O	1
C00242	Guanine	HMDB0000132	764	C00242	NC1=NC(=O)C2=C(N1)N=CN2	1
C00147	Adenine	HMDB0000034	190	C00147	NC1=C2NC=NC2=NC=N1	1
C00366	Uric acid	HMDB0000289	1175	C00366	O=C1NC2=C(N1)C(=O)NC(=O)N2	1
C00385	Xanthine	HMDB0000292	1188	C00385	O=C1NC2=C(NC=N2)C(=O)N1	1
C00387	Guanosine	HMDB0000133	6802	C00387	NC1=NC2=C(N=CN2[C@@H]2O[C@H](CO)[C@@H](O)[C@H]2O)C(=O)N1	1
C00262	Hypoxanthine	HMDB0000157	790	C00262	OC1=NC=NC2=C1NC=N2	1
C00294	Inosine	HMDB0000195	6021	C00294	OC[C@H]1O[C@H]([C@H](O)[C@@H]1O)N1C=NC2=C(O)N=CN=C12	1
C01762	Xanthosine	HMDB0000299	64959	C01762	OC[C@H]1O[C@H]([C@H](O)[C@@H]1O)N1C=NC2=C1N=C(O)N=C2O	1
C00186	Lactic acid	HMDB0000190	107689	C00186	C[C@H](O)C(O)=O	1
C00166	Phenylpyruvic acid	HMDB0000205	997	C00166	OC(=O)C(=O)CC1=CC=CC=C1	1
C00164	Acetoacetic acid	HMDB0000060	96	C00164	CC(=O)CC(O)=O	1
C02154	Glyceraldehyde	HMDB0001051	751	C02154	OCC(O)C=O	1
C01074	NA	NA	NA	NA	NA	0
C00711	NA	NA	NA	NA	NA	0
C00062	L-Arginine	HMDB0000517	6322	C00062	N[C@@H](CCCNC(N)=N)C(O)=O	1
C00327	Citrulline	HMDB0000904	9750	C00327	N[C@@H](CCCNC(N)=O)C(O)=O	1
C00135	Histidine	HMDB0000177	6274	C00135	N[C@@H](CC1=CN=CN1)C(O)=O	1
C00785	Urocanic acid	HMDB0000301	736715	C00785	OC(=O)\C=C\C1=CNC=N1	1
C01152	1-Methylhistidine	HMDB0000001	92105	C01152	CN1C=NC(C[C@H](N)C(O)=O)=C1	1
C00386	Carnosine	HMDB0000033	439224	C00386	NCCC(=O)N[C@@H](CC1=CN=CN1)C(O)=O	1
C00864	Pantothenic acid	HMDB0000210	6613	C00864	CC(C)(CO)[C@@H](O)C(=O)NCCC(O)=O	1
C02835	Imidazoleacetic acid	HMDB0002024	96215	C02835	OC(=O)CC1=CN=CN1	1
C00954	Indoleacetic acid	HMDB0000197	802	C00954	OC(=O)CC1=CNC2=C1C=CC=C2	1
C01717	Kynurenic acid	HMDB0000715	3845	C01717	OC(=O)C1=CC(=O)C2=CC=CC=C2N1	1
C00632	3-Hydroxyanthranilic acid	HMDB0001476	86	C00632	NC1=C(O)C=CC=C1C(O)=O	1
C00978	N-Acetylserotonin	HMDB0001238	903	C00978	CC(=O)NCCC1=CNC2=C1C=C(O)C=C2	1
C00780	Serotonin	HMDB0000259	5202	C00780	NCCC1=CNC2=C1C=C(O)C=C2	1
C00058	Formic acid	HMDB0000142	284	C00058	OC=O	1
C00398	Tryptamine	HMDB0000303	1150	C00398	NCCC1=CNC2=C1C=CC=C2	1
C03722	Quinolinic acid	HMDB0000232	1066	C03722	OC(=O)C1=CC=CN=C1C(O)=O	1
C02406	N'-Formylkynurenine	HMDB0001200	910	C02406	NC(CC(=O)C1=CC=CC=C1NC=O)C(O)=O	1
C00300	Creatine	HMDB0000064	586	C00300	CN(CC(O)=O)C(N)=N	1
C00430	5-Aminolevulinic acid	HMDB0001149	137	C00430	NCC(=O)CCC(O)=O	1
C00581	Guanidoacetic acid	HMDB0000128	763	C00581	NC(=N)NCC(O)=O	1
C00719	Betaine	HMDB0000043	247	C00719	C[N+](C)(C)CC(O)=O	1
C05330	NA	NA	NA	NA	NA	0
C00258	Glyceric acid	HMDB0000139	439194	C00258	OC[C@@H](O)C(O)=O	1
C00148	Proline	HMDB0000162	145742	C00148	OC(=O)[C@@H]1CCCN1	1
C01157	4-Hydroxyproline	HMDB0000725	5810	C01157	O[C@H]1CN[C@@H](C1)C(O)=O	1
C00642	p-Hydroxyphenylacetic acid	HMDB0000020	127	C00642	OC(=O)CC1=CC=C(O)C=C1	1
C00425	NA	NA	NA	NA	NA	0
C00355	DOPA	HMDB0000181	6047	C00355	N[C@@H](CC1=CC=C(O)C(O)=C1)C(O)=O	1
