# Supplementary material for: Temporal Integration of Serum Proteomics, Metabolomics and MRI Tumor Volumetrics via Deep Learning Identifies Systemic Mediators of Glioblastoma Response to Chemoradiotherapy
Source: Research Square preprint supplement (doi:10.21203/rs.3.rs-9085743/v1), 2026-03-18
Supplement: Supplementary file 3 [file 8e53c713ad368ca83ff18de2.xlsx]

## Sheet: DE_Prot_55_Pairs_sig
	GeneName	P.val	Log2FC	fdr
KRT5	KRT5	1.98872e-15	0.880392	1.27378e-11
SFN	SFN	7.48347e-14	0.684729	2.39658e-10
GDF15	GDF15	2.87801e-13	0.75014	4.60842e-10
KRT1	KRT1	2.5804e-13	0.763282	4.60842e-10
CST6	CST6	4.83174e-07	-0.293349	0.000119028
GFAP	GFAP	3.79083e-08	-0.557846	2.42803e-05
FAS	FAS	3.01959e-11	0.315614	3.86809e-08
MMP10	MMP10	1.63484e-08	0.30734	1.30889e-05
PRSS2	PRSS2	1.20064e-07	0.507959	6.13627e-05
PRTN3	PRTN3	1.50265e-07	-0.341127	6.82192e-05
PRSS1	PRSS1	1.51263e-08	0.361914	1.30889e-05
SELENOF	SELENOF	3.9757e-07	0.239306	0.000115747
PNLIPRP1	PNLIPRP1	2.24138e-07	0.448656	7.5558e-05
SELENOW	SELENOW	1.83889e-07	0.212629	6.82192e-05
PMEL	PMEL	4.58766e-07	0.451987	0.000119028
PSAPL1	PSAPL1	1.64969e-05	-0.221528	0.00125789
LMNB2	LMNB2	5.06233e-08	0.559849	2.94766e-05
TAGLN	TAGLN	5.26913e-07	0.236608	0.000124995
CTRB2	CTRB2	2.76894e-08	0.541072	1.97056e-05
CPB1	CPB1	4.81039e-07	0.450056	0.000119028
FSTL3	FSTL3	2.8047e-06	0.217218	0.000427717
BOC	BOC	1.65123e-07	0.371105	6.82192e-05
PGM5	PGM5	3.37974e-06	0.29794	0.000462349
CXCL3	CXCL3	1.74202e-05	-0.659936	0.00128248
MMP2	MMP2	1.24546e-07	0.245604	6.13627e-05
MMP1	MMP1	7.44448e-06	-0.498376	0.00078167
THAP4	THAP4	1.04885e-05	0.294671	0.000933041
L1CAM	L1CAM	3.72656e-07	0.353066	0.00011366
CKMT1A	CKMT1A	0.00018562	0.376018	0.00487252
CST5	CST5	3.02859e-06	0.528823	0.000451119
CBR3	CBR3	4.68772e-07	0.211366	0.000119028
FCGRT	FCGRT	6.46039e-06	0.251107	0.000724977
WFDC2	WFDC2	0.000138478	0.262359	0.00408732
THPO	THPO	6.45117e-05	0.559825	0.0026831
FCMR	FCMR	0.000262207	-0.243386	0.00600674
CXCL2	CXCL2	7.6324e-05	-0.410997	0.00301021
CAMP	CAMP	0.000182178	-0.316246	0.00482903
TFF2	TFF2	5.65624e-05	0.24426	0.00244785
EHD2	EHD2	3.42062e-05	0.332153	0.0018567
REG1B	REG1B	0.000175594	0.260843	0.00482623
DKK3	DKK3	1.0199e-05	0.217349	0.000933041
AMY2B	AMY2B	4.09064e-06	0.318362	0.000534705
AMY2A	AMY2A	5.55293e-07	0.330864	0.000127023
XCL1	XCL1	1.80019e-06	0.342279	0.000333757
PRSS27	PRSS27	1.00872e-05	-0.203005	0.000933041
BIK	BIK	0.000155897	-0.354422	0.00437948
TLNRD1	TLNRD1	0.000385412	0.256618	0.00762078
SORCS1	SORCS1	2.37656e-06	0.209913	0.00037332
IL1R1	IL1R1	1.63619e-05	0.261939	0.00125789
CTRB1	CTRB1	2.38971e-06	0.416366	0.00037332
TNFRSF1B	TNFRSF1B	2.15827e-06	0.320978	0.00036575
CCL28	CCL28	2.24762e-06	-0.42147	0.000369128
REG3A	REG3A	0.000933037	0.286743	0.0130455
IL15RA	IL15RA	2.65533e-05	0.333662	0.00166739
ASB9	ASB9	0.000626117	0.222148	0.0101826
DPY30	DPY30	2.1342e-05	0.449694	0.00151884
NFE2L2	NFE2L2	0.000176321	-0.385981	0.00482623
PDGFD	PDGFD	0.000264177	-0.328438	0.00602154
TP53I13	TP53I13	4.50224e-06	-0.654645	0.000556109
NAB2	NAB2	0.000295452	-0.29104	0.00643178
ICAM4	ICAM4	1.68561e-05	-0.259416	0.00126032
MSMB	MSMB	0.000525697	0.285185	0.00930134
WFDC13	WFDC13	0.000728018	-0.21585	0.0110235
PRKCSH	PRKCSH	3.86886e-05	0.204658	0.00199839
REG1A	REG1A	0.000128059	0.309426	0.00394335
FCN1	FCN1	0.000851051	-0.283192	0.0123325
DNAJB11	DNAJB11	0.00025627	-0.307514	0.00590545
BTN3A2	BTN3A2	4.16983e-05	0.275952	0.00211966
FLRT3	FLRT3	0.000213209	0.20083	0.00528518
REG4	REG4	0.000352035	0.285187	0.00712524
CAB39L	CAB39L	3.7166e-05	0.227019	0.00195405
COL2A1	COL2A1	0.000652031	-0.508422	0.0103887
RNASE1	RNASE1	4.77354e-05	0.225879	0.00233038
PNLIP	PNLIP	3.21195e-07	0.421971	0.000102863
CELA2A	CELA2A	8.62542e-05	0.327161	0.00322212
BMP4	BMP4	0.000478362	-0.257635	0.00881436
RTN4RL1	RTN4RL1	8.49372e-06	0.21487	0.000851359
NT5C	NT5C	0.000124054	0.203395	0.00387594
REG3G	REG3G	7.90154e-05	0.404618	0.00304876
FUT8	FUT8	0.000592971	-0.33567	0.00994236
SVEP1	SVEP1	5.55958e-05	0.204174	0.00242239
OMD	OMD	1.53635e-05	0.241736	0.00123917
HSD11B1	HSD11B1	5.23601e-05	0.286211	0.00236174
HAVCR2	HAVCR2	8.90353e-06	0.223272	0.00087734
CNTN1	CNTN1	5.31503e-06	0.203828	0.000607907
CRK	CRK	5.06945e-05	0.214514	0.00233038
TLL1	TLL1	9.04581e-06	0.284116	0.000877854
UBE2E1	UBE2E1	4.99038e-05	0.294779	0.00233038
CEL	CEL	0.000471602	-0.30318	0.00879276
P05556|P56199	P05556|P56199	2.77554e-05	0.544953	0.00169308
PRSS3	PRSS3	2.3831e-05	0.265039	0.00157358
SLITRK3	SLITRK3	9.24059e-05	0.212509	0.00333294
FSCN1	FSCN1	0.000143556	0.265228	0.00419053
OXCT1	OXCT1	0.00101568	0.228265	0.0135812
GBP1	GBP1	5.48388e-05	0.588164	0.00240577
FMOD	FMOD	0.00024184	0.209778	0.00568312
SERPINE1	SERPINE1	0.000627968	-0.311332	0.0101826
VNN2	VNN2	0.000570134	-0.280242	0.00977763
TRA2B	TRA2B	0.000117867	0.311962	0.00381281
CRTAM	CRTAM	1.85714e-06	0.372835	0.000333757
AKR1B1	AKR1B1	0.000223768	0.230865	0.00544494
MPO	MPO	0.000362508	-0.313895	0.00727856
VSIG4	VSIG4	0.000862872	0.265178	0.0123948
PRSS57	PRSS57	3.21018e-06	-0.291753	0.000462349
CD79A	CD79A	0.00222901	-0.279733	0.0218337
UNC5B	UNC5B	0.000117023	0.212037	0.00381281
EPHA1	EPHA1	8.67916e-05	0.213231	0.00322212
CXCL9	CXCL9	5.00048e-05	0.632329	0.00233038
NAXE	NAXE	2.31733e-05	0.211539	0.00156237
UBE2E3	UBE2E3	0.000172106	0.227418	0.00477202
MDH2	MDH2	0.000269843	0.48888	0.00610722
YAP1	YAP1	1.80666e-06	0.233329	0.000333757
FLRT2	FLRT2	0.000625156	0.207433	0.0101826
PARVA	PARVA	7.70801e-05	0.218766	0.00301021
P29459|Q14213	P29459|Q14213	0.00517158	0.207598	0.0362804
FCGR3B	FCGR3B	9.44488e-05	0.270756	0.00334224
HBEGF	HBEGF	0.00404745	-0.458587	0.0309903
EPS8L2	EPS8L2	0.000145246	0.309621	0.00419053
MANF	MANF	0.000903806	-0.332107	0.0128357
ANXA2	ANXA2	0.000181751	0.262795	0.00482903
ME2	ME2	0.000472242	0.454652	0.00879276
COCH	COCH	0.0013009	-0.391074	0.0157114
SCGB3A1	SCGB3A1	0.000612697	0.318854	0.010104
ITPA	ITPA	0.000358532	0.257955	0.00722137
BPIFB1	BPIFB1	0.000309987	0.250747	0.0065744
RANBP3	RANBP3	0.000233105	0.205971	0.00555032
PDGFA	PDGFA	0.00332661	-0.394437	0.027352
CRISPLD2	CRISPLD2	0.00228524	-0.504923	0.0219057
GOT2	GOT2	8.10008e-05	0.61094	0.00308815
EBI3	EBI3	0.00424868	0.21358	0.0319399
CHI3L1	CHI3L1	0.000112513	-0.291776	0.00375335
FTO	FTO	0.000558593	0.409282	0.00972225
FKBP4	FKBP4	0.000275495	0.319372	0.00614825
CLEC1B	CLEC1B	0.000532793	-0.331131	0.00937512
FZD7	FZD7	0.000393586	0.225131	0.0076847
B4GALT7	B4GALT7	0.00331266	-0.309428	0.027307
AP2A2	AP2A2	0.000646041	0.257725	0.0103189
RARRES1	RARRES1	0.000269621	-0.221435	0.00610722
SERPINE2	SERPINE2	0.00340904	-0.44143	0.0277798
PALMD	PALMD	0.000701239	0.23003	0.0107708
RBP5	RBP5	0.00026259	0.40446	0.00600674
TMPO	TMPO	0.000512259	0.346134	0.00919053
SIGLEC11	SIGLEC11	0.000212535	0.216974	0.00528518
G3BP1	G3BP1	0.00378977	0.256598	0.0297105
PPBP	PPBP	0.00307153	-0.523914	0.0261959
RRM2B	RRM2B	0.000611367	0.233562	0.010104
FZD2	FZD2	0.000212404	0.222208	0.00528518
NCAN	NCAN	1.91717e-07	-0.266304	6.82192e-05
PTPN11	PTPN11	0.00572498	0.279473	0.0381109
COL5A1	COL5A1	5.36019e-05	0.315359	0.002387
LAG3	LAG3	0.000191539	0.432889	0.00496683
CD33	CD33	0.000315224	0.216895	0.0066634
HSPE1	HSPE1	0.000173325	0.572957	0.00478511
PDCD5	PDCD5	0.00272999	0.233896	0.0242188
CXCL10	CXCL10	0.000591195	0.521403	0.00994236
GIPC2	GIPC2	0.000284196	0.329698	0.00623382
LOXL3	LOXL3	0.00367214	-0.386179	0.0291446
KLK14	KLK14	0.00447016	0.215245	0.033215
SPON2	SPON2	0.000700508	0.265723	0.0107708
PLXNC1	PLXNC1	0.000932121	0.201744	0.0130455
CD163	CD163	0.000865386	0.231656	0.0124
SEPHS1	SEPHS1	0.00311311	0.296064	0.0262765
POR	POR	0.000924614	0.516009	0.0130157
GCHFR	GCHFR	0.000863086	0.38487	0.0123948
NUDT21	NUDT21	0.00108256	0.305474	0.0140931
YWHAE	YWHAE	0.000675326	0.290574	0.0105757
RIDA	RIDA	0.00180703	0.510591	0.0191563
HSPA1A	HSPA1A	0.00167844	0.270214	0.0184398
CLIC2	CLIC2	0.000439186	0.299112	0.00839698
EPHB2	EPHB2	0.00184705	0.200528	0.0193954
TNFSF12-TNFSF13	TNFSF12-TNFSF13	9.92766e-05	-0.212546	0.00343712
STARD10	STARD10	0.00147454	0.466952	0.0169558
ITGB7	ITGB7	0.0059837	-0.235663	0.0392278
TPPP3	TPPP3	0.00302684	0.235369	0.0259183
CPXM1	CPXM1	0.00272904	-0.336166	0.0242188
AGER	AGER	0.00597725	0.26274	0.0392278
CDCP1	CDCP1	0.00176134	0.300403	0.0189285
ST13	ST13	0.00256564	0.291171	0.0233091
P07288|P01011	P07288|P01011	1.12698e-06	-0.292277	0.000240611
TPSAB1	TPSAB1	0.00159261	0.242559	0.0178022
APOL2	APOL2	0.000282492	0.522806	0.00623119
B2M	B2M	0.000394733	0.200474	0.0076847
IL18BP	IL18BP	0.00248106	0.26312	0.022898
GBP2	GBP2	0.000477787	0.299582	0.00881436
ACAT1	ACAT1	0.000643498	0.69821	0.0103189
PSAT1	PSAT1	0.00153003	0.513484	0.0174065
RFX5	RFX5	0.000248381	0.217441	0.00578501
PTGR1	PTGR1	0.00423855	0.426481	0.0319012
HAVCR1	HAVCR1	0.00195467	0.260771	0.0199746
PI3	PI3	0.00250026	0.214135	0.0229429
GFER	GFER	0.000818331	0.288961	0.0119302
LACTB2	LACTB2	0.00448379	0.246989	0.0332392
BPNT1	BPNT1	0.00243562	0.209988	0.0227475
CD8A	CD8A	0.000165536	0.2999	0.00462996
CS	CS	0.00222982	0.364278	0.0218337
DCTPP1	DCTPP1	0.00666866	0.255743	0.0423738
UBXN4	UBXN4	0.000386808	0.379215	0.00762078
DNAJA4	DNAJA4	0.000622363	0.291603	0.0101826
MGMT	MGMT	0.00324048	-0.310637	0.0269549
AK2	AK2	0.00463112	0.351648	0.0338094
MDH1	MDH1	0.000451094	0.322187	0.00849781
XPNPEP1	XPNPEP1	0.00533727	0.26608	0.0366352
G3BP2	G3BP2	0.00573002	0.290737	0.0381109
FBP1	FBP1	0.000516386	0.567867	0.00921296
HSPA9	HSPA9	0.00022402	0.4932	0.00544494
H3C1	H3C1	0.00260484	0.22182	0.0235756
ELANE	ELANE	0.00547747	-0.233692	0.0369778
NUDT5	NUDT5	0.000588348	0.228828	0.00994236
HTRA2	HTRA2	0.00201948	0.241079	0.0205602
ECHS1	ECHS1	0.00137897	0.674465	0.0162958
ACAA1	ACAA1	0.000446059	0.51926	0.00844104
THOP1	THOP1	0.00292582	0.246536	0.0254272
P29460|Q9NPF7	P29460|Q9NPF7	0.000254633	0.204363	0.00590545
S100A12	S100A12	0.00102318	-0.267399	0.013611
SUMF2	SUMF2	0.00357245	0.207282	0.0287457
HSPA8	HSPA8	0.00466946	0.235277	0.0339477
LRATD2	LRATD2	0.001885	0.28629	0.0196956
CLYBL	CLYBL	0.00123138	0.685364	0.0152552
OLR1	OLR1	0.00589545	-0.317613	0.0388082
P01222|P01215	P01222|P01215	0.00189696	0.292299	0.0197883
AKR1A1	AKR1A1	0.00273005	0.304555	0.0242188
APOL3	APOL3	0.00439164	0.320382	0.0327616
SORD	SORD	0.00362118	0.573206	0.0289198
SCLY	SCLY	0.0012901	0.421318	0.0156663
APOF	APOF	0.0053665	0.21425	0.0366804
GSTA2	GSTA2	0.00454761	0.511212	0.0334798
PCBD1	PCBD1	0.00132529	0.459628	0.0158724
PRDX3	PRDX3	0.00234397	0.297383	0.0221542
ACADVL	ACADVL	0.00795551	0.372216	0.0467477
MVD	MVD	0.0029786	0.255058	0.0256424
GLO1	GLO1	0.00392591	0.339411	0.0304154
PHPT1	PHPT1	0.00534939	0.275167	0.0366352
GRHPR	GRHPR	0.00396135	0.367932	0.0305692
HIBCH	HIBCH	0.00203869	0.406754	0.0206802
ISOC1	ISOC1	0.00229125	0.234352	0.0219057
TPSB2	TPSB2	0.00162436	0.266628	0.0180625
ECHDC1	ECHDC1	0.00148942	0.344493	0.0170359
PPP1R10	PPP1R10	0.00324785	0.270171	0.0269812
MAGOH	MAGOH	0.00787171	0.219537	0.046383
ACO1	ACO1	0.00403847	0.346032	0.0309777
TKFC	TKFC	0.00878779	0.385745	0.0497224
COQ9	COQ9	0.00756006	-0.405982	0.0452645
AKR1C4	AKR1C4	0.00296929	0.704323	0.0256213
RDX	RDX	0.00183086	0.333209	0.019319
WNK3	WNK3	0.00633608	0.250437	0.0408687
GATM	GATM	0.00180542	0.566863	0.0191563
HSPD1	HSPD1	0.00433273	0.37072	0.0324575
PRG3	PRG3	0.00112878	0.229221	0.0144194
TFF1	TFF1	0.00268693	0.249591	0.0240288
CPOX	CPOX	0.00655822	0.262625	0.0418798
PDCD1	PDCD1	0.00193585	0.228169	0.0199746
PLA2G12B	PLA2G12B	0.00523234	-0.203947	0.0363483
ADH1C	ADH1C	0.00360862	0.621335	0.0289198
REXO2	REXO2	0.00216176	0.239327	0.0214399
PRDX1	PRDX1	0.00352935	0.338166	0.0285636
HMGCS2	HMGCS2	0.00136077	0.383272	0.0161104
LAP3	LAP3	0.00748268	0.317166	0.045041
FTCD	FTCD	0.0016733	0.731076	0.018415
GRPEL1	GRPEL1	0.00154846	0.413968	0.0175538
DECR1	DECR1	0.00376595	0.303814	0.0296161
ERP44	ERP44	0.00195535	-0.210607	0.0199746
GDI1	GDI1	0.00855011	0.206005	0.0488088
SHMT2	SHMT2	0.00811582	0.420741	0.0471704
ACOT13	ACOT13	0.008344	0.38634	0.0482341
ATP5PF	ATP5PF	0.00614842	0.372295	0.0401434
FAHD1	FAHD1	0.00490993	0.280748	0.0350741
GMPS	GMPS	0.00340392	0.300295	0.0277734
F9	F9	6.30656e-05	-0.276328	0.00265747
WNT5A	WNT5A	0.00482462	0.201581	0.034721
P0C0L5|P0C0L4	P0C0L5|P0C0L4	0.00317365	-0.297559	0.0266762
UGP2	UGP2	0.00673585	0.341197	0.0426151
PSMA7	PSMA7	0.00603857	0.344806	0.0395471
LANCL1	LANCL1	0.00877564	0.20598	0.0496976
DLD	DLD	0.00270114	0.227328	0.0240958
HAO1	HAO1	0.00325411	0.312041	0.0269981
PKLR	PKLR	0.00420442	0.364412	0.0317442
TXNRD1	TXNRD1	0.00548714	0.202843	0.0369778
OTC	OTC	0.00429349	0.530997	0.0322012
AMT	AMT	0.00836809	0.268419	0.0482743
CRYZ	CRYZ	0.00686603	0.410694	0.0431146
ALDH2	ALDH2	0.0071487	0.47834	0.0438997
AGXT	AGXT	0.00364597	0.234214	0.0290454

## Sheet: DE_Metabolomics_55_Pairs_sig_FD
	GeneName	P.val	Log2FC	fdr
GUANOSINE	C00387	0.0030095	-0.331612	0.0752374
INOSINE+Cl	C00294	0.0029863	-0.328755	0.0752374
CAFFEINE	C07481	0.0251806	-0.314999	0.23884
HYPOXANTHINE	C00262	0.000840934	-0.31355	0.0657305
THEOPHYLLINE	C07130	0.00901722	-0.281231	0.14492
DEOXYURIDINE-H2O	C00526	0.000876407	-0.272022	0.0657305
URIDINE	C00299	0.000226974	-0.253701	0.0510692
SEROTONIN-NH3	C00780	0.00298357	-0.248521	0.0752374
XANTHINE	C00385	0.00201987	-0.232784	0.0752374
SUBERIC ACID	C08278	0.0171522	0.203624	0.194041
GUANINE	C00242	0.0236031	0.21095	0.23884
CHOLATE-2H2O	C00695	0.0265377	0.227601	0.23884
