# Supplementary material for: Temporal Integration of Serum Proteomics, Metabolomics and MRI Tumor Volumetrics via Deep Learning Identifies Systemic Mediators of Glioblastoma Response to Chemoradiotherapy
Source: Research Square preprint supplement (doi:10.21203/rs.3.rs-9085743/v1), 2026-03-18
Supplement: Supplementary file 4 [file ae0ad58bbddd1db66582ca4b.xlsx]

## Sheet: Prot_GSEA_GO_hs
SigGeneNumInGroup	SigGeneNum	GeneNumInGroup	GeneNumInDB	Pvalue	Gene	item.ID	item.name	bonferroni	fdr
4	269	4	20563	0	REG3A REG1A REG1B REG3G	GO:0044278	cell wall disruption in other organism	0	0
2	269	2	20563	0	AKR1B1 SORD	GO:0046370	fructose biosynthetic process	0	0
2	269	2	20563	0	AKR1B1 AKR1A1	GO:0047956	glycerol dehydrogenase [NADP+] activity	0	0
2	269	2	20563	0	G3BP2 G3BP1	GO:0062029	positive regulation of stress granule assembly	0	0
3	269	20	20563	0.000117637	OLR1 APOL2 APOL3	GO:0042157	lipoprotein metabolic process	0.0889339	0.00069211
3	269	20	20563	0.000117637	HSPD1 WNT5A HAVCR2	GO:0043032	positive regulation of macrophage activation	0.0889339	0.00069211
2	269	8	20563	0.000118098	AKR1B1 AKR1C4	GO:0001758	retinal dehydrogenase activity	0.0892822	0.00069211
2	269	8	20563	0.000118098	B2M CXCL2	GO:0002237	response to molecule of bacterial origin	0.0892822	0.00069211
2	269	8	20563	0.000118098	BMP4 RRM2B	GO:0003014	renal system process	0.0892822	0.00069211
2	269	8	20563	0.000118098	COL2A1 B4GALT7	GO:0006029	proteoglycan metabolic process	0.0892822	0.00069211
2	269	8	20563	0.000118098	NUDT5 REXO2	GO:0009117	nucleotide metabolic process	0.0892822	0.00069211
2	269	8	20563	0.000118098	FCN1 SERPINE2	GO:0031232	extrinsic component of external side of plasma membrane	0.0892822	0.00069211
2	269	8	20563	0.000118098	BMP4 SFN	GO:0045606	positive regulation of epidermal cell differentiation	0.0892822	0.00069211
8	269	144	20563	0.000119997	FKBP4 HSPA8 HSPD1 HSPE1 ST13 ERP44 DNAJB11 GRPEL1	GO:0006457	protein folding	0.0907177	0.000697829
4	269	38	20563	0.00013015	REG3A CD163 APOL2 REG3G	GO:0006953	acute-phase response	0.0983934	0.000740692
5	269	60	20563	0.000131287	APOF STARD10 APOL2 APOL3 NAXE	GO:0006869	lipid transport	0.0992527	0.000740692
5	269	60	20563	0.000131287	AKR1B1 BMP4 HBEGF ELANE PDGFD	GO:0048661	positive regulation of smooth muscle cell proliferation	0.0992527	0.000740692
5	269	60	20563	0.000131287	ACADVL DLD GFER POR TXNRD1	GO:0050660	flavin adenine dinucleotide binding	0.0992527	0.000740692
3	269	21	20563	0.000143828	AKR1B1 AKR1C4 PTGR1	GO:0006693	prostaglandin metabolic process	0.108734	0.000787927
3	269	21	20563	0.000143828	FZD2 WNT5A FZD7	GO:0035567	non-canonical Wnt signaling pathway	0.108734	0.000787927
3	269	21	20563	0.000143828	GFAP HSPA8 PTPN11	GO:0043254	regulation of protein-containing complex assembly	0.108734	0.000787927
3	269	21	20563	0.000143828	AKR1B1 APOL2 HAVCR2	GO:0060135	maternal process involved in female pregnancy	0.108734	0.000787927
3	269	22	20563	0.000173989	CEL PNLIP PNLIPRP1	GO:0004806	triglyceride lipase activity	0.131536	0.000872552
3	269	22	20563	0.000173989	CD33 FCN1 SIGLEC11	GO:0033691	sialic acid binding	0.131536	0.000872552
2	269	9	20563	0.000175434	FCN1 KRT1	GO:0001867	complement activation, lectin pathway	0.132628	0.000872552
2	269	9	20563	0.000175434	MDH1 MDH2	GO:0006734	NADH metabolic process	0.132628	0.000872552
2	269	9	20563	0.000175434	EPHB2 L1CAM	GO:0008046	axon guidance receptor activity	0.132628	0.000872552
2	269	9	20563	0.000175434	EPHB2 RTN4RL1	GO:0022038	corpus callosum development	0.132628	0.000872552
2	269	9	20563	0.000175434	COL2A1 YAP1	GO:0030903	notochord development	0.132628	0.000872552
2	269	9	20563	0.000175434	GOT2 GRHPR	GO:0031406	carboxylic acid binding	0.132628	0.000872552
2	269	9	20563	0.000175434	IL18BP EBI3	GO:0042088	T-helper 1 type immune response	0.132628	0.000872552
2	269	9	20563	0.000175434	PTPN11 WNT5A	GO:0048806	genitalia development	0.132628	0.000872552
2	269	9	20563	0.000175434	GFAP PTPN11	GO:0060020	Bergmann glial cell differentiation	0.132628	0.000872552
2	269	9	20563	0.000175434	BMP4 COL2A1	GO:0060272	embryonic skeletal joint morphogenesis	0.132628	0.000872552
2	269	9	20563	0.000175434	FZD2 WNT5A	GO:0090179	planar cell polarity pathway involved in neural tube closure	0.132628	0.000872552
2	269	9	20563	0.000175434	CRK PTPN11	GO:1990314	cellular response to insulin-like growth factor stimulus	0.132628	0.000872552
5	269	64	20563	0.000188222	FKBP4 HSPA1A HSPA8 HSPA9 ST13	GO:0031072	heat shock protein binding	0.142296	0.00093004
6	269	91	20563	0.000192512	ANXA2 ELANE MPO PRSS2 PRTN3 PRSS57	GO:0035578	azurophil granule lumen	0.145539	0.000945058
4	269	42	20563	0.000211369	ACAT1 OXCT1 POR SORD	GO:0009725	response to hormone	0.159795	0.00103094
6	269	94	20563	0.000235504	FKBP4 HSPA8 FSCN1 ST13 FLRT3 FLRT2	GO:0030674	protein-macromolecule adaptor activity	0.178041	0.00111689
2	269	10	20563	0.000248197	ECHS1 ECHDC1	GO:0004300	enoyl-CoA hydratase activity	0.187637	0.00111689
2	269	10	20563	0.000248197	FAS TNFRSF1B	GO:0005031	tumor necrosis factor-activated receptor activity	0.187637	0.00111689
2	269	10	20563	0.000248197	NFE2L2 PKLR	GO:0010226	response to lithium ion	0.187637	0.00111689
2	269	10	20563	0.000248197	CEL PNLIP	GO:0030299	intestinal cholesterol absorption	0.187637	0.00111689
2	269	10	20563	0.000248197	SERPINE1 PTPN11	GO:0033629	negative regulation of cell adhesion mediated by integrin	0.187637	0.00111689
2	269	10	20563	0.000248197	COL5A1 HBEGF	GO:0035313	wound healing, spreading of epidermal cells	0.187637	0.00111689
2	269	10	20563	0.000248197	SHMT2 FTCD	GO:0035999	tetrahydrofolate interconversion	0.187637	0.00111689
2	269	10	20563	0.000248197	PDGFA PDGFD	GO:0070851	growth factor receptor binding	0.187637	0.00111689
2	269	10	20563	0.000248197	AKR1B1 BMP4	GO:0072205	metanephric collecting duct development	0.187637	0.00111689
2	269	10	20563	0.000248197	HSPA1A DNAJA4	GO:0090084	negative regulation of inclusion body assembly	0.187637	0.00111689
2	269	10	20563	0.000248197	AGER B2M	GO:0090647	modulation of age-related behavioral decline	0.187637	0.00111689
2	269	10	20563	0.000248197	CEL EPHB2	GO:0097104	postsynaptic membrane assembly	0.187637	0.00111689
20	269	680	20563	0.000257807	AGXT B2M CPOX GBP1 GBP2 HSD11B1 MVD PDGFA XCL1 SHMT2 XPNPEP1 GRHPR GDF15 NUDT21 NUDT5 FLRT3 SCLY COQ9 GRPEL1 DPY30	GO:0042803	protein homodimerization activity	0.194902	0.00115327
6	269	98	20563	0.000304522	ANXA2 SERPINE1 PI3 SERPINE2 WFDC2 WFDC13	GO:0004867	serine-type endopeptidase inhibitor activity	0.230219	0.00135423
13	269	361	20563	0.00030851	APOF EPHB2 FCN1 HSPA1A CXCL10 SERPINE1 SERPINE2 PRTN3 THPO PLXNC1 BTN3A2 APOL2 CRTAM	GO:0005102	signaling receptor binding	0.233233	0.00136394
4	269	46	20563	0.000326403	ANXA2 PDGFA WNT5A PDGFD	GO:0048146	positive regulation of fibroblast proliferation	0.246761	0.0014098
2	269	11	20563	0.000337973	CD8A BTN3A2	GO:0002456	T cell mediated immunity	0.255508	0.0014098
2	269	11	20563	0.000337973	B2M XCL1	GO:0002726	positive regulation of T cell cytokine production	0.255508	0.0014098
2	269	11	20563	0.000337973	BMP4 WNT5A	GO:0003139	secondary heart field specification	0.255508	0.0014098
2	269	11	20563	0.000337973	ECHS1 HIBCH	GO:0009083	branched-chain amino acid catabolic process	0.255508	0.0014098
2	269	11	20563	0.000337973	FCGR3B FCGRT	GO:0019864	IgG binding	0.255508	0.0014098
2	269	11	20563	0.000337973	FAS PRDX1	GO:0032872	regulation of stress-activated MAPK cascade	0.255508	0.0014098
2	269	11	20563	0.000337973	AKR1B1 ANXA2	GO:0043220	Schmidt-Lanterman incisure	0.255508	0.0014098
2	269	11	20563	0.000337973	MMP1 MMP2	GO:0071492	cellular response to UV-A	0.255508	0.0014098
2	269	11	20563	0.000337973	NFE2L2 PTPN11	GO:1904385	cellular response to angiotensin	0.255508	0.0014098
3	269	26	20563	0.00034126	HSPA1A HSPA8 HSPA9	GO:0034620	cellular response to unfolded protein	0.257993	0.0014098
3	269	26	20563	0.00034126	HBEGF REG3A REG3G	GO:0090303	positive regulation of wound healing	0.257993	0.0014098
8	269	166	20563	0.000348229	EPHA1 EPHB2 L1CAM WNT5A FLRT3 FLRT2 BOC UNC5B	GO:0007411	axon guidance	0.263261	0.00143077
5	269	72	20563	0.00035952	ELANE F9 MMP1 MMP2 CELA2A	GO:0004175	endopeptidase activity	0.271797	0.00146917
10	269	242	20563	0.000363535	ANXA2 FAS CD79A CNTN1 CRK HSPD1 OLR1 TNFRSF1B RTN4RL1 UNC5B	GO:0045121	membrane raft	0.274832	0.00147759
6	269	101	20563	0.000366246	ANXA2 GCHFR HSPA8 PRDX1 PMEL YWHAE	GO:0042470	melanosome	0.276882	0.00148065
3	269	27	20563	0.000396516	BMP4 COL2A1 NAB2	GO:0001958	endochondral ossification	0.299766	0.00157867
3	269	27	20563	0.000396516	B2M HSPA8 YWHAE	GO:0023026	MHC class II protein complex binding	0.299766	0.00157867
16	269	507	20563	0.000396755	BMP4 CAMP HBEGF EPHA1 CXCL10 MVD REG3A PDGFA PRTN3 REG1A REG1B SHMT2 THPO PRDX3 PDGFD REG3G	GO:0008284	positive regulation of cell population proliferation	0.299947	0.00157867
4	269	48	20563	0.000399154	CAMP PI3 WFDC2 WFDC13	GO:0019731	antibacterial humoral response	0.301761	0.0015799
7	269	136	20563	0.000430021	CAMP CHI3L1 GBP1 GBP2 NFE2L2 XCL1 IL18BP	GO:0071356	cellular response to tumor necrosis factor	0.325096	0.00169321
6	269	104	20563	0.000437605	NCAN F9 FMOD OMD PDGFA WNT5A	GO:0005796	Golgi lumen	0.330829	0.00171363
2	269	12	20563	0.00044628	ACAT1 PKLR	GO:0030955	potassium ion binding	0.337388	0.00171363
2	269	12	20563	0.00044628	EPHB2 GDI1	GO:0050771	negative regulation of axonogenesis	0.337388	0.00171363
2	269	12	20563	0.00044628	WNT5A SPON2	GO:0060907	positive regulation of macrophage cytokine production	0.337388	0.00171363
3	269	28	20563	0.000457876	EPHA1 FSTL3 LOXL3	GO:0001968	fibronectin binding	0.346154	0.00171363
3	269	28	20563	0.000457876	CLIC2 GSTA2 LANCL1	GO:0004364	glutathione transferase activity	0.346154	0.00171363
3	269	28	20563	0.000457876	MPO PRDX1 PRDX3	GO:0042744	hydrogen peroxide catabolic process	0.346154	0.00171363
3	269	28	20563	0.000457876	FKBP4 L1CAM FLRT3	GO:0044295	axonal growth cone	0.346154	0.00171363
3	269	28	20563	0.000457876	MPO S100A12 SPON2	GO:0050832	defense response to fungus	0.346154	0.00171363
3	269	28	20563	0.000457876	MMP2 PTPN11 CRISPLD2	GO:0060325	face morphogenesis	0.346154	0.00171363
6	269	107	20563	0.000519652	HSPA8 HSPD1 HSPE1 ST13 DNAJA4 GRPEL1	GO:0051087	chaperone binding	0.392857	0.00193525
3	269	29	20563	0.000525712	CXCL10 CXCL9 XCL1	GO:0051281	positive regulation of release of sequestered calcium ion into cytosol	0.397439	0.00193872
3	269	29	20563	0.000525712	ACAT1 OXCT1 FTO	GO:0060612	adipose tissue development	0.397439	0.00193872
6	269	108	20563	0.000549567	KRT1 MPO PRDX1 PRDX3 RRM2B HAO1	GO:0006979	response to oxidative stress	0.415473	0.00201686
2	269	13	20563	0.000574566	HSPD1 APOL2	GO:0008035	high-density lipoprotein particle binding	0.434372	0.00204892
2	269	13	20563	0.000574566	MPO PRDX1	GO:0019430	removal of superoxide radicals	0.434372	0.00204892
2	269	13	20563	0.000574566	SERPINE1 SERPINE2	GO:0030195	negative regulation of blood coagulation	0.434372	0.00204892
2	269	13	20563	0.000574566	CRK PTPN11	GO:0033628	regulation of cell adhesion mediated by integrin	0.434372	0.00204892
2	269	13	20563	0.000574566	BMP4 DKK3	GO:0039706	co-receptor binding	0.434372	0.00204892
2	269	13	20563	0.000574566	BMP4 GDF15	GO:0070700	BMP receptor binding	0.434372	0.00204892
3	269	30	20563	0.0006004	CHI3L1 WNT5A WNK3	GO:0010800	positive regulation of peptidyl-threonine phosphorylation	0.453902	0.00212104
3	269	30	20563	0.0006004	PDGFA PTPN11 PDGFD	GO:0048008	platelet-derived growth factor receptor signaling pathway	0.453902	0.00212104
9	269	219	20563	0.000644975	AGER BMP4 CHI3L1 PDGFA PTPN11 XCL1 THPO PDGFD HAVCR2	GO:0070374	positive regulation of ERK1 and ERK2 cascade	0.487601	0.00226791
3	269	31	20563	0.000682315	AK2 HSPA1A HSPA8	GO:0046034	ATP metabolic process	0.51583	0.0023881
6	269	113	20563	0.000720337	MMP1 MMP2 MMP10 PRSS2 THOP1 TLL1	GO:0004222	metalloendopeptidase activity	0.544575	0.00243336
5	269	82	20563	0.000722802	HSPA1A MGMT NFE2L2 PRDX3 HTRA2	GO:0034599	cellular response to oxidative stress	0.546438	0.00243336
2	269	14	20563	0.000724214	BMP4 WNT5A	GO:0003323	type B pancreatic cell development	0.547506	0.00243336
2	269	14	20563	0.000724214	AKR1C4 AKR1A1	GO:0004033	aldo-keto reductase (NADP) activity	0.547506	0.00243336
2	269	14	20563	0.000724214	THOP1 CPXM1	GO:0006518	peptide metabolic process	0.547506	0.00243336
2	269	14	20563	0.000724214	REG3A REG3G	GO:0010838	positive regulation of keratinocyte proliferation	0.547506	0.00243336
2	269	14	20563	0.000724214	COL2A1 COL5A1	GO:0043394	proteoglycan binding	0.547506	0.00243336
2	269	14	20563	0.000724214	AGER ANXA2	GO:0044548	S100 protein binding	0.547506	0.00243336
2	269	14	20563	0.000724214	NFE2L2 HTRA2	GO:1902176	negative regulation of oxidative stress-induced intrinsic apoptotic signaling pathway	0.547506	0.00243336
17	269	585	20563	0.000738428	AGER ANXA2 FAS CEL HBEGF ELANE GOT2 HSPD1 IL15RA ITGB7 L1CAM PDGFA WNT5A ERP44 HAVCR1 HAVCR2 RTN4RL1	GO:0009986	cell surface	0.558251	0.00247014
4	269	55	20563	0.000752846	AGXT GOT2 SHMT2 PSAT1	GO:0030170	pyridoxal phosphate binding	0.569152	0.00250728
3	269	32	20563	0.000771836	FZD2 WNT5A FZD7	GO:0060071	Wnt signaling pathway, planar cell polarity pathway	0.583508	0.00255924
4	269	56	20563	0.000817935	EPHA1 ITGB7 FZD7 PARVA	GO:0034446	substrate adhesion-dependent cell spreading	0.618359	0.00268706
4	269	56	20563	0.000817935	EPHB2 SLITRK3 FLRT3 FLRT2	GO:0051965	positive regulation of synapse assembly	0.618359	0.00268706
5	269	84	20563	0.000821047	CAMP CHI3L1 GBP1 GBP2 XCL1	GO:0071347	cellular response to interleukin-1	0.620711	0.00268706
7	269	151	20563	0.000857951	COL2A1 COL5A1 GFAP MMP1 MMP2 MMP10 CRISPLD2	GO:0030198	extracellular matrix organization	0.648611	0.00277782
3	269	33	20563	0.000869342	CD8A PRTN3 PTPN11	GO:0044853	plasma membrane raft	0.657223	0.00277782
3	269	33	20563	0.000869342	COL2A1 HSPA1A UNC5B	GO:2001240	negative regulation of extrinsic apoptotic signaling pathway in absence of ligand	0.657223	0.00277782
4	269	57	20563	0.000887128	B2M CRYZ SHMT2 ACOT13	GO:0051289	protein homotetramerization	0.670669	0.00277782
2	269	15	20563	0.000896544	BIK HSPD1	GO:0008637	apoptotic mitochondrial changes	0.677787	0.00277782
2	269	15	20563	0.000896544	XCL1 WNT5A	GO:0010820	positive regulation of T cell chemotaxis	0.677787	0.00277782
2	269	15	20563	0.000896544	NFE2L2 SERPINE1	GO:0030194	positive regulation of blood coagulation	0.677787	0.00277782
2	269	15	20563	0.000896544	TFF1 TFF2	GO:0030277	maintenance of gastrointestinal epithelium	0.677787	0.00277782
2	269	15	20563	0.000896544	KRT1 PI3	GO:0030280	structural constituent of skin epidermis	0.677787	0.00277782
2	269	15	20563	0.000896544	KRT1 NUDT21	GO:0051290	protein heterotetramerization	0.677787	0.00277782
2	269	15	20563	0.000896544	COL5A1 B4GALT7	GO:0097435	supramolecular fiber organization	0.677787	0.00277782
2	269	15	20563	0.000896544	AGER PRDX1	GO:1901222	regulation of NIK/NF-kappaB signaling	0.677787	0.00277782
2	269	15	20563	0.000896544	AGER MMP2	GO:1904645	response to amyloid-beta	0.677787	0.00277782
3	269	34	20563	0.000975215	CAMP HSPD1 SPON2	GO:0001530	lipopolysaccharide binding	0.737263	0.00296089
3	269	34	20563	0.000975215	CST5 CST6 WFDC2	GO:0004869	cysteine-type endopeptidase inhibitor activity	0.737263	0.00296089
3	269	34	20563	0.000975215	CRK PTPN11 G3BP2	GO:0030159	signaling receptor complex adaptor activity	0.737263	0.00296089
3	269	34	20563	0.000975215	BMP4 GBP2 YWHAE	GO:0034504	protein localization to nucleus	0.737263	0.00296089
3	269	34	20563	0.000975215	CD79A EPHB2 HSPD1	GO:0042113	B cell activation	0.737263	0.00296089
11	269	316	20563	0.000984592	SFN HSPA1A HSPA8 PRDX1 PTPN11 RDX FSCN1 TMPO YWHAE PARVA EPS8L2	GO:0045296	cadherin binding	0.744352	0.00297388
5	269	87	20563	0.000987361	ELANE HSPD1 MPO FSTL3 KLK14	GO:0030141	secretory granule	0.746445	0.00297388
4	269	59	20563	0.00103847	AGER B2M EPHB2 GATM	GO:0007611	learning or memory	0.785081	0.00310309
4	269	59	20563	0.00103847	B2M BMP4 WNT5A RIDA	GO:0050680	negative regulation of epithelial cell proliferation	0.785081	0.00310309
3	269	35	20563	0.00108984	FCGR3B LAG3 PDCD1	GO:0050776	regulation of immune response	0.823915	0.00316539
3	269	35	20563	0.00108984	SFN PRKCSH YWHAE	GO:0051219	phosphoprotein binding	0.823915	0.00316539
2	269	16	20563	0.00109281	POR HAO1	GO:0010181	FMN binding	0.826166	0.00316539
2	269	16	20563	0.00109281	CNTN1 WNK3	GO:0010765	positive regulation of sodium ion transport	0.826166	0.00316539
2	269	16	20563	0.00109281	PNLIP PNLIPRP1	GO:0016298	lipase activity	0.826166	0.00316539
2	269	16	20563	0.00109281	FMOD PRG3	GO:0030021	extracellular matrix structural constituent conferring compression resistance	0.826166	0.00316539
2	269	16	20563	0.00109281	FZD2 FZD7	GO:0042813	Wnt-activated receptor activity	0.826166	0.00316539
2	269	16	20563	0.00109281	RIDA FTO	GO:0061157	mRNA destabilization	0.826166	0.00316539
7	269	160	20563	0.00124659	AGER CD79A FCGR3B IL1R1 LAG3 FCMR CLEC1B	GO:0004888	transmembrane signaling receptor activity	0.942424	0.00359704
2	269	17	20563	0.00131421	CPB1 LAP3	GO:0004180	carboxypeptidase activity	0.993546	0.0036798
2	269	17	20563	0.00131421	EPHA1 EPHB2	GO:0005005	transmembrane-ephrin receptor activity	0.993546	0.0036798
2	269	17	20563	0.00131421	HSPD1 PKLR	GO:0033198	response to ATP	0.993546	0.0036798
2	269	17	20563	0.00131421	PTPN11 THPO	GO:0035855	megakaryocyte development	0.993546	0.0036798
2	269	17	20563	0.00131421	MMP1 MMP2	GO:0044267	cellular protein metabolic process	0.993546	0.0036798
2	269	17	20563	0.00131421	SFN YWHAE	GO:0046827	positive regulation of protein export from nucleus	0.993546	0.0036798
2	269	17	20563	0.00131421	BMP4 WNT5A	GO:0061036	positive regulation of cartilage development	0.993546	0.0036798
2	269	17	20563	0.00131421	HSPA8 DNAJB11	GO:0101031	chaperone complex	0.993546	0.0036798
3	269	37	20563	0.00134684	ACADVL HSPD1 CXCL10	GO:0009409	response to cold	1	0.00374341
3	269	37	20563	0.00134684	PDGFA FLRT3 FLRT2	GO:0050919	negative chemotaxis	1	0.00374341
5	269	93	20563	0.0013966	AGER HSPD1 PTPN11 WNT5A SPON2	GO:0032755	positive regulation of interleukin-6 production	1	0.00386751
2	269	18	20563	0.00156189	DLD GOT2	GO:0006103	2-oxoglutarate metabolic process	1	0.00426277
2	269	18	20563	0.00156189	FUT8 PRKCSH	GO:0006491	N-glycan processing	1	0.00426277
2	269	18	20563	0.00156189	PDGFA PDGFD	GO:0050730	regulation of peptidyl-tyrosine phosphorylation	1	0.00426277
2	269	18	20563	0.00156189	HSPA8 WNT5A	GO:0099175	regulation of postsynapse organization	1	0.00426277
3	269	39	20563	0.00164338	COL2A1 COL5A1 FLRT2	GO:0003007	heart morphogenesis	1	0.00446904
4	269	66	20563	0.00172143	B2M FKBP4 GFAP RTN4RL1	GO:0010977	negative regulation of neuron projection development	1	0.00464786
4	269	66	20563	0.00172143	WNT5A FZD7 YAP1 HTRA2	GO:0071300	cellular response to retinoic acid	1	0.00464786
3	269	40	20563	0.00180742	HSPA1A HSPA8 HSPA9	GO:0044183	protein folding chaperone	1	0.00484868
2	269	19	20563	0.00183691	ACADVL FTO	GO:0001659	temperature homeostasis	1	0.00484868
2	269	19	20563	0.00183691	FSTL3 DKK3	GO:0030325	adrenal gland development	1	0.00484868
2	269	19	20563	0.00183691	HSPD1 DNAJB11	GO:0051604	protein maturation	1	0.00484868
2	269	19	20563	0.00183691	CRK SERPINE1	GO:0061045	negative regulation of wound healing	1	0.00484868
4	269	67	20563	0.0018407	PDGFA RDX FSCN1 STARD10	GO:0005902	microvillus	1	0.00484868
4	269	67	20563	0.0018407	CRK KRT5 YWHAE CD163	GO:0097110	scaffold protein binding	1	0.00484868
4	269	68	20563	0.00196591	OXCT1 PKLR POR CCL28	GO:0007584	response to nutrient	1	0.00514266
4	269	68	20563	0.00196591	ACADVL FZD2 GSTA2 TAGLN	GO:0030855	epithelial cell differentiation	1	0.00514266
3	269	41	20563	0.00198247	B2M KRT1 PRDX1	GO:0001895	retina homeostasis	1	0.00515033
3	269	41	20563	0.00198247	ELANE GBP1 EBI3	GO:0019955	cytokine binding	1	0.00515033
14	269	490	20563	0.00211263	CD33 CNTN1 COL5A1 NCAN ICAM4 ITGB7 L1CAM OMD PGM5 PLXNC1 SPON2 SVEP1 BOC SIGLEC11	GO:0007155	cell adhesion	1	0.00546969
2	269	20	20563	0.00214032	PDGFA WNT5A	GO:0002053	positive regulation of mesenchymal cell proliferation	1	0.00548501
2	269	20	20563	0.00214032	HSPD1 REG3G	GO:0002755	MyD88-dependent toll-like receptor signaling pathway	1	0.00548501
2	269	20	20563	0.00214032	ADH1C AKR1A1	GO:0004745	NAD-retinol dehydrogenase activity	1	0.00548501
3	269	42	20563	0.0021689	SFN TNFRSF1B HTRA2	GO:0008630	intrinsic apoptotic signaling pathway in response to DNA damage	1	0.00552084
3	269	42	20563	0.0021689	AGER WNT5A HAVCR2	GO:0032722	positive regulation of chemokine production	1	0.00552084
6	269	137	20563	0.00220294	AP2A2 STARD10 APOL2 COQ9 APOL3 BPIFB1	GO:0008289	lipid binding	1	0.00558867
4	269	70	20563	0.00223484	AP2A2 HBEGF FZD2 WNT5A	GO:0030669	clathrin-coated endocytic vesicle membrane	1	0.00565063
3	269	43	20563	0.00236708	MVD ST13 DNAJA4	GO:0030544	Hsp70 protein binding	1	0.00595514
4	269	71	20563	0.0023789	AP2A2 HBEGF WNT5A CD163	GO:0030666	endocytic vesicle membrane	1	0.00595514
4	269	71	20563	0.0023789	NFE2L2 PTPN11 IL18BP PDGFD	GO:0070301	cellular response to hydrogen peroxide	1	0.00595514
2	269	21	20563	0.00247306	B2M SERPINE1	GO:0048260	positive regulation of receptor-mediated endocytosis	1	0.00615012
2	269	21	20563	0.00247306	CXCL10 SERPINE1	GO:0090026	positive regulation of monocyte chemotaxis	1	0.00615012
4	269	72	20563	0.0025296	CXCL9 MPO TPSAB1 CLEC1B	GO:0006952	defense response	1	0.0062701
3	269	44	20563	0.00257737	CLIC2 GLO1 GSTA2	GO:0006749	glutathione metabolic process	1	0.00634688
3	269	44	20563	0.00257737	ACADVL HSPA9 SHMT2	GO:0042645	mitochondrial nucleoid	1	0.00634688
6	269	141	20563	0.00259048	APOF CEL CRK PNLIP PNLIPRP1 APOL2	GO:0006629	lipid metabolic process	1	0.00635845
3	269	45	20563	0.00280014	CST6 KRT1 PI3	GO:0001533	cornified envelope	1	0.00670023
3	269	45	20563	0.00280014	BMP4 HTRA2 TP53I13	GO:0045786	negative regulation of cell cycle	1	0.00670023
2	269	22	20563	0.00283607	F9 PRSS3	GO:0031638	zymogen activation	1	0.00670023
2	269	22	20563	0.00283607	BMP4 PTPN11	GO:0032331	negative regulation of chondrocyte differentiation	1	0.00670023
2	269	22	20563	0.00283607	RDX PDGFD	GO:0036120	cellular response to platelet-derived growth factor stimulus	1	0.00670023
2	269	22	20563	0.00283607	BMP4 CXCL10	GO:0045662	negative regulation of myoblast differentiation	1	0.00670023
2	269	22	20563	0.00283607	CXCL9 BOC	GO:0045663	positive regulation of myoblast differentiation	1	0.00670023
2	269	22	20563	0.00283607	HSPA8 TRA2B	GO:0048026	positive regulation of mRNA splicing, via spliceosome	1	0.00670023
2	269	22	20563	0.00283607	GBP1 PHPT1	GO:0050860	negative regulation of T cell receptor signaling pathway	1	0.00670023
2	269	22	20563	0.00283607	HSPA1A HSPD1	GO:0051131	chaperone-mediated protein complex assembly	1	0.00670023
2	269	22	20563	0.00283607	SHMT2 NUDT21	GO:0051262	protein tetramerization	1	0.00670023
2	269	22	20563	0.00283607	SLITRK3 FLRT3	GO:0099560	synaptic membrane adhesion	1	0.00670023
4	269	74	20563	0.00285161	ELANE PDGFA S100A12 PDGFD	GO:0043406	positive regulation of MAP kinase activity	1	0.00671593
3	269	46	20563	0.00303573	PTPN11 FLRT3 FLRT2	GO:0008543	fibroblast growth factor receptor signaling pathway	1	0.00712737
2	269	23	20563	0.00323022	PDGFA PARVA	GO:0030031	cell projection assembly	1	0.00749093
2	269	23	20563	0.00323022	G3BP2 G3BP1	GO:0034063	stress granule assembly	1	0.00749093
2	269	23	20563	0.00323022	CRK PCBD1	GO:0043393	regulation of protein binding	1	0.00749093
2	269	23	20563	0.00323022	FZD2 WNT5A	GO:0090103	cochlea morphogenesis	1	0.00749093
3	269	47	20563	0.0032845	AGER CD163 LOXL3	GO:0005044	scavenger receptor activity	1	0.00757038
3	269	47	20563	0.0032845	PDGFA PPBP PDGFD	GO:0051781	positive regulation of cell division	1	0.00757038
4	269	77	20563	0.00338874	ACAT1 GFER OTC PRKCSH	GO:0001889	liver development	1	0.00778689
7	269	188	20563	0.00340838	BMP4 CXCL9 THPO WNT5A GDF15 EBI3 SCGB3A1	GO:0005125	cytokine activity	1	0.00780829
6	269	149	20563	0.0035209	CRK COCH RDX PLXNC1 PALMD PARVA	GO:0008360	regulation of cell shape	1	0.00804169
5	269	112	20563	0.00357039	BMP4 WNT5A RIDA FSTL3 RRM2B	GO:0001822	kidney development	1	0.00813016
2	269	24	20563	0.00365631	FLRT3 FLRT2	GO:0005104	fibroblast growth factor receptor binding	1	0.00820228
2	269	24	20563	0.00365631	PDGFA PDGFD	GO:0031954	positive regulation of protein autophosphorylation	1	0.00820228
2	269	24	20563	0.00365631	HTRA2 FTO	GO:0040014	regulation of multicellular organism growth	1	0.00820228
2	269	24	20563	0.00365631	LAG3 CRTAM	GO:0045954	positive regulation of natural killer cell mediated cytotoxicity	1	0.00820228
2	269	24	20563	0.00365631	EPHB2 FBP1	GO:0046580	negative regulation of Ras protein signal transduction	1	0.00820228
5	269	113	20563	0.0037302	CXCL2 CXCL10 L1CAM CXCL9 CCL28	GO:0006935	chemotaxis	1	0.00834329
6	269	153	20563	0.00407213	CAMP CHI3L1 EPHA1 NFE2L2 SERPINE1 WNT5A	GO:0045766	positive regulation of angiogenesis	1	0.00904367
3	269	50	20563	0.00411338	ADH1C AKR1B1 PNLIP	GO:0042572	retinol metabolic process	1	0.00904367
2	269	25	20563	0.00411511	B2M XCL1	GO:0001916	positive regulation of T cell mediated cytotoxicity	1	0.00904367
2	269	25	20563	0.00411511	BMP4 PARVA	GO:0003148	outflow tract septum morphogenesis	1	0.00904367
2	269	25	20563	0.00411511	APOF APOL3	GO:0005319	lipid transporter activity	1	0.00904367
2	269	25	20563	0.00411511	SFN KRT1	GO:0061436	establishment of skin barrier	1	0.00904367
2	269	26	20563	0.00460735	EPHA1 CCL28	GO:0001954	positive regulation of cell-matrix adhesion	1	0.010015
2	269	26	20563	0.00460735	SERPINE2 CRISPLD2	GO:0005539	glycosaminoglycan binding	1	0.010015
2	269	26	20563	0.00460735	IL18BP DKK3	GO:0048019	receptor antagonist activity	1	0.010015
5	269	118	20563	0.00461007	AGER CNTN1 L1CAM MANF FLRT3	GO:0031175	neuron projection development	1	0.010015
4	269	83	20563	0.00467517	CRK EPHA1 RDX PLXNC1	GO:0043087	regulation of GTPase activity	1	0.0101273
3	269	52	20563	0.00473811	CRK HSPD1 PRDX3	GO:0042542	response to hydrogen peroxide	1	0.0102343
13	269	484	20563	0.00484355	AKR1B1 FAS BMP4 GLO1 HSPA1A HSPA9 HSPD1 MGMT MPO WNT5A FCMR PRDX3 WNK3	GO:0043066	negative regulation of apoptotic process	1	0.0104323
5	269	120	20563	0.00500165	CHI3L1 HBEGF PDGFA THPO GDF15	GO:0051897	positive regulation of protein kinase B signaling	1	0.0107422
2	269	27	20563	0.00513371	CAMP BPIFB1	GO:0002227	innate immune response in mucosa	1	0.0109019
2	269	27	20563	0.00513371	FLRT3 FLRT2	GO:0045499	chemorepellent activity	1	0.0109019
2	269	27	20563	0.00513371	B2M SORD	GO:0046686	response to cadmium ion	1	0.0109019
2	269	27	20563	0.00513371	XPNPEP1 LAP3	GO:0070006	metalloaminopeptidase activity	1	0.0109019
4	269	85	20563	0.00517193	AGER IL1R1 XCL1 WNT5A	GO:0050727	regulation of inflammatory response	1	0.0109523
3	269	54	20563	0.00542363	CHI3L1 COL2A1 WNT5A	GO:0051216	cartilage development	1	0.0114532
2	269	28	20563	0.0056948	AKR1B1 AKR1C4	GO:0001523	retinoid metabolic process	1	0.0118163
2	269	28	20563	0.0056948	XPNPEP1 LAP3	GO:0004177	aminopeptidase activity	1	0.0118163
2	269	28	20563	0.0056948	HSPA9 RANBP3	GO:0006611	protein export from nucleus	1	0.0118163
2	269	28	20563	0.0056948	KRT1 PI3	GO:0018149	peptide cross-linking	1	0.0118163
2	269	28	20563	0.0056948	ITGB7 PARVA	GO:0034113	heterotypic cell-cell adhesion	1	0.0118163
2	269	28	20563	0.0056948	BIK PDCD5	GO:0090200	positive regulation of release of cytochrome c from mitochondria	1	0.0118163
4	269	87	20563	0.00570494	CBR3 GSTA2 POR S100A12	GO:0006805	xenobiotic metabolic process	1	0.0118163
5	269	124	20563	0.00585731	FCN1 HSPA1A HSPA8 KRT1 CRISPLD2	GO:1904813	ficolin-1-rich granule lumen	1	0.0120987
2	269	29	20563	0.00629124	COCH HAVCR2	GO:0045089	positive regulation of innate immune response	1	0.0129244
2	269	29	20563	0.00629124	CEL SLITRK3	GO:0099060	integral component of postsynaptic specialization membrane	1	0.0129244
3	269	57	20563	0.00657132	PGM5 SORD AKR1A1	GO:0006006	glucose metabolic process	1	0.0134632
2	269	30	20563	0.00692355	CPB1 CPXM1	GO:0004181	metallocarboxypeptidase activity	1	0.0140327
2	269	30	20563	0.00692355	BPNT1 REXO2	GO:0006139	nucleobase-containing compound metabolic process	1	0.0140327
2	269	30	20563	0.00692355	FZD2 FZD7	GO:0017147	Wnt-protein binding	1	0.0140327
2	269	30	20563	0.00692355	B2M FZD7	GO:0033077	T cell differentiation in thymus	1	0.0140327
4	269	92	20563	0.00720492	CEL POR EHD2 CLYBL	GO:0016787	hydrolase activity	1	0.0145251
4	269	92	20563	0.00720492	GBP1 GBP2 XCL1 WNT5A	GO:0071346	cellular response to interferon-gamma	1	0.0145251
3	269	59	20563	0.00741954	COL2A1 EPHB2 LOXL3	GO:0060021	roof of mouth development	1	0.014918
2	269	31	20563	0.00759226	HSPA1A RIDA	GO:0006402	mRNA catabolic process	1	0.0152248
7	269	216	20563	0.00774474	EPHA1 EPHB2 GATM PDCD1 THPO FSTL3 APOL2	GO:0007275	multicellular organism development	1	0.0154895
4	269	94	20563	0.00787535	PDGFA REG1A WNT5A YAP1	GO:0042060	wound healing	1	0.0156678
4	269	94	20563	0.00787535	AGER EPHB2 PSMA7 WNT5A	GO:0098794	postsynapse	1	0.0156678
4	269	95	20563	0.00822629	NCAN FMOD HSPA8 OMD	GO:0043202	lysosomal lumen	1	0.0162023
4	269	95	20563	0.00822629	HSPD1 SERPINE1 S100A12 WNT5A	GO:0050729	positive regulation of inflammatory response	1	0.0162023
2	269	32	20563	0.00829782	PARVA NAXE	GO:0002040	sprouting angiogenesis	1	0.0162023
2	269	32	20563	0.00829782	NFE2L2 PPP1R10	GO:0010667	negative regulation of cardiac muscle cell apoptotic process	1	0.0162023
2	269	32	20563	0.00829782	B2M HSPD1	GO:0050870	positive regulation of T cell activation	1	0.0162023
2	269	32	20563	0.00829782	AGER BMP4	GO:1900745	positive regulation of p38MAPK cascade	1	0.0162023
2	269	32	20563	0.00829782	CRK PTPN11	GO:1990782	protein tyrosine kinase binding	1	0.0162023
3	269	61	20563	0.0083369	ANXA2 HSPA8 HAVCR1	GO:0001786	phosphatidylserine binding	1	0.0162023
3	269	61	20563	0.0083369	AGXT CRK MDH2	GO:0043621	protein self-association	1	0.0162023
3	269	62	20563	0.00882218	BMP4 HSPA1A TNFRSF1B	GO:0060548	negative regulation of cell death	1	0.0171015
2	269	33	20563	0.00904067	MPO PRDX1	GO:0004601	peroxidase activity	1	0.0173799
2	269	33	20563	0.00904067	BMP4 PDGFA	GO:0048286	lung alveolus development	1	0.0173799
2	269	33	20563	0.00904067	BMP4 COL2A1	GO:0071773	cellular response to BMP stimulus	1	0.0173799
7	269	222	20563	0.00905778	ANXA2 EPHA1 EPHB2 MMP2 SERPINE1 PDGFA UNC5B	GO:0001525	angiogenesis	1	0.0173799
4	269	98	20563	0.00934396	FAS CRK GFAP PRDX3	GO:0019900	kinase binding	1	0.0178836
2	269	34	20563	0.00982119	CXCL10 OLR1	GO:0008015	blood circulation	1	0.0186553
2	269	34	20563	0.00982119	CD79A HSPD1	GO:0042100	B cell proliferation	1	0.0186553
2	269	34	20563	0.00982119	GDI1 L1CAM	GO:0045773	positive regulation of axon extension	1	0.0186553
3	269	64	20563	0.00984725	AGER GFAP PDGFA	GO:0009611	response to wounding	1	0.018658
3	269	65	20563	0.0103875	XPNPEP1 B4GALT7 LAP3	GO:0030145	manganese ion binding	1	0.0195835
3	269	65	20563	0.0103875	RNASE1 RIDA LACTB2	GO:0090502	RNA phosphodiester bond hydrolysis, endonucleolytic	1	0.0195835
4	269	101	20563	0.0105621	DLD SORD STARD10 HAVCR1	GO:0031514	motile cilium	1	0.019863
2	269	35	20563	0.0106398	BMP4 CXCL10	GO:0042056	chemoattractant activity	1	0.0199594
3	269	66	20563	0.0109466	EPHA1 EPHB2 SFN	GO:0006469	negative regulation of protein kinase activity	1	0.0204843
4	269	102	20563	0.0109911	CAMP GBP2 HAVCR2 REG3G	GO:0050830	defense response to Gram-positive bacterium	1	0.0205168
2	269	36	20563	0.0114967	HMGCS2 MVD	GO:0006695	cholesterol biosynthetic process	1	0.0209441
2	269	36	20563	0.0114967	MMP2 TPPP3	GO:0007566	embryo implantation	1	0.0209441
2	269	36	20563	0.0114967	MMP2 PRDX3	GO:0034614	cellular response to reactive oxygen species	1	0.0209441
2	269	36	20563	0.0114967	OXCT1 PHPT1	GO:0035774	positive regulation of insulin secretion involved in cellular response to glucose stimulus	1	0.0209441
2	269	36	20563	0.0114967	UBE2E1 UBE2E3	GO:0061631	ubiquitin conjugating enzyme activity	1	0.0209441
2	269	36	20563	0.0114967	AP2A2 HSPA1A	GO:0097718	disordered domain specific binding	1	0.0209441
2	269	36	20563	0.0114967	NFE2L2 SERPINE1	GO:2000352	negative regulation of endothelial cell apoptotic process	1	0.0209441
2	269	36	20563	0.0114967	BMP4 YAP1	GO:2001237	negative regulation of extrinsic apoptotic signaling pathway	1	0.0209441
8	269	279	20563	0.0115015	AGER CD8A EPHA1 FCGR3B IL1R1 CXCL10 LAG3 CLEC1B	GO:0007166	cell surface receptor signaling pathway	1	0.0209441
3	269	67	20563	0.0115248	SERPINE1 PDGFA PPBP	GO:0031093	platelet alpha granule lumen	1	0.0209441
3	269	67	20563	0.0115248	SFN POR PRDX3	GO:0043154	negative regulation of cysteine-type endopeptidase activity involved in apoptotic process	1	0.0209441
5	269	144	20563	0.0117986	ELANE HSPD1 MPO IL18BP PRDX3	GO:0032496	response to lipopolysaccharide	1	0.0213902
4	269	104	20563	0.0118846	ANXA2 ELANE IL1R1 SERPINE1	GO:0002020	protease binding	1	0.0214947
3	269	68	20563	0.0121222	SFN WNT5A YWHAE	GO:0034613	cellular protein localization	1	0.02182
3	269	68	20563	0.0121222	FZD2 WNT5A FZD7	GO:0060070	canonical Wnt signaling pathway	1	0.02182
2	269	37	20563	0.0123923	BMP4 COL2A1	GO:0002062	chondrocyte differentiation	1	0.0220956
2	269	37	20563	0.0123923	WNT5A FZD7	GO:0005109	frizzled binding	1	0.0220956
2	269	37	20563	0.0123923	SCLY FTO	GO:0016740	transferase activity	1	0.0220956
2	269	37	20563	0.0123923	COL5A1 PDGFA	GO:0043588	skin development	1	0.0220956
3	269	69	20563	0.0127391	FCN1 HSPA1A HSPA8	GO:0001664	G protein-coupled receptor binding	1	0.0226607
2	269	38	20563	0.0133267	CD33 ELANE	GO:0032717	negative regulation of interleukin-8 production	1	0.0235949
2	269	38	20563	0.0133267	HSD11B1 POR	GO:0050661	NADP binding	1	0.0235949
3	269	70	20563	0.0133758	CRK HBEGF CCL28	GO:0060326	cell chemotaxis	1	0.0236264
3	269	71	20563	0.0140323	B2M BMP4 WNT5A	GO:0032092	positive regulation of protein binding	1	0.0246707
3	269	71	20563	0.0140323	GOT2 OTC CELA2A	GO:0032868	response to insulin	1	0.0246707
2	269	39	20563	0.0143004	ACAT1 OXCT1	GO:0042594	response to starvation	1	0.0249678
2	269	39	20563	0.0143004	NFE2L2 PTPN11	GO:0046326	positive regulation of glucose import	1	0.0249678
2	269	39	20563	0.0143004	CHI3L1 IL1R1	GO:0070555	response to interleukin-1	1	0.0249678
2	269	40	20563	0.0153133	PI3 WFDC2	GO:0004866	endopeptidase inhibitor activity	1	0.0266135
2	269	40	20563	0.0153133	AGXT PKLR	GO:0051591	response to cAMP	1	0.0266135
5	269	153	20563	0.0155183	AGER HSPA1A S100A12 WNT5A PRDX3	GO:0051092	positive regulation of NF-kappaB transcription factor activity	1	0.0269078
7	269	245	20563	0.0156647	L1CAM NFE2L2 PTPN11 TRA2B ST13 WNT5A EHD2	GO:0019904	protein domain specific binding	1	0.0270996
6	269	199	20563	0.0160541	AGER ANXA2 FAS BMP4 CAMP THPO	GO:0001934	positive regulation of protein phosphorylation	1	0.0277098
2	269	41	20563	0.0163657	COL2A1 COL5A1	GO:0030020	extracellular matrix structural constituent conferring tensile strength	1	0.0279921
2	269	41	20563	0.0163657	HSPD1 XCL1	GO:0032733	positive regulation of interleukin-10 production	1	0.0279921
2	269	41	20563	0.0163657	AGER HSPD1	GO:0032735	positive regulation of interleukin-12 production	1	0.0279921
2	269	41	20563	0.0163657	VSIG4 HAVCR2	GO:0042130	negative regulation of T cell proliferation	1	0.0279921
6	269	200	20563	0.0164571	CAMP COCH ELANE MPO PPBP S100A12	GO:0042742	defense response to bacterium	1	0.0280849
4	269	113	20563	0.0165164	ACADVL BIK SORD HTRA2	GO:0031966	mitochondrial membrane	1	0.0281226
3	269	75	20563	0.0168613	CRK PDGFA FSCN1	GO:0032956	regulation of actin cytoskeleton organization	1	0.0286452
2	269	42	20563	0.0174578	PKLR DNAJA4	GO:0009408	response to heat	1	0.0291993
2	269	42	20563	0.0174578	ELANE TP53I13	GO:0009411	response to UV	1	0.0291993
2	269	42	20563	0.0174578	GFAP SVEP1	GO:0010467	gene expression	1	0.0291993
2	269	42	20563	0.0174578	GOT2 RDX	GO:0030315	T-tubule	1	0.0291993
2	269	42	20563	0.0174578	XCL1 HAVCR2	GO:0032689	negative regulation of interferon-gamma production	1	0.0291993
2	269	42	20563	0.0174578	AGER WNT5A	GO:0043507	positive regulation of JUN kinase activity	1	0.0291993
2	269	42	20563	0.0174578	FAS TNFRSF1B	GO:0097191	extrinsic apoptotic signaling pathway	1	0.0291993
4	269	115	20563	0.0176876	FCN1 HSPA8 S100A12 CRISPLD2	GO:0034774	secretory granule lumen	1	0.0295184
4	269	116	20563	0.0182933	AK2 EPHB2 SEPHS1 CKMT1A	GO:0016310	phosphorylation	1	0.030462
3	269	77	20563	0.0183999	SHMT2 RIDA PRG3	GO:0017148	negative regulation of translation	1	0.0305721
3	269	78	20563	0.0192008	HSPA1A ITGB7 HAVCR1	GO:0001618	virus receptor activity	1	0.0317633
3	269	78	20563	0.0192008	CLIC2 TXNRD1 PRDX3	GO:0098869	cellular oxidant detoxification	1	0.0317633
2	269	44	20563	0.0197612	CRTAM HAVCR2	GO:0001772	immunological synapse	1	0.0324771
2	269	44	20563	0.0197612	CRK PTPN11	GO:0001784	phosphotyrosine residue binding	1	0.0324771
2	269	44	20563	0.0197612	OLR1 FCMR	GO:0002376	immune system process	1	0.0324771
3	269	79	20563	0.020023	CST6 KRT5 SVEP1	GO:0008544	epidermis development	1	0.0327649
3	269	79	20563	0.020023	PDGFA PDGFD UNC5B	GO:0014068	positive regulation of phosphatidylinositol 3-kinase signaling	1	0.0327649
3	269	80	20563	0.0208666	HBEGF SFN PRSS2	GO:0030307	positive regulation of cell growth	1	0.0339516
2	269	45	20563	0.0209727	S100A12 XCL1	GO:0002548	monocyte chemotaxis	1	0.0339516
2	269	45	20563	0.0209727	DLD COQ9	GO:0006120	mitochondrial electron transport, NADH to ubiquinone	1	0.0339516
2	269	45	20563	0.0209727	BMP4 CXCL10	GO:0050918	positive chemotaxis	1	0.0339516
2	269	45	20563	0.0209727	EPHB2 FLRT3	GO:0099055	integral component of postsynaptic membrane	1	0.0339516
10	269	415	20563	0.0212679	FAS B2M CD8A FCGR3B FCGRT GBP2 IL1R1 TNFRSF1B PRG3 CCL28	GO:0006955	immune response	1	0.0343558
5	269	165	20563	0.0216447	AGER HSPD1 MMP2 PKLR REG1A	GO:0001666	response to hypoxia	1	0.03489
11	269	472	20563	0.0220976	BMP4 CNTN1 EPHB2 HSPA1A NFE2L2 RDX REG1A WNT5A PDCD5 YAP1 DNAJA4	GO:0010628	positive regulation of gene expression	1	0.0352972
4	269	122	20563	0.0222153	FBP1 HSPA1A SERPINE2 SCGB3A1	GO:0030308	negative regulation of cell growth	1	0.0352972
2	269	46	20563	0.0222241	WNT5A LOXL3	GO:0001837	epithelial to mesenchymal transition	1	0.0352972
2	269	46	20563	0.0222241	IL15RA EBI3	GO:0004896	cytokine receptor activity	1	0.0352972
2	269	46	20563	0.0222241	FUT8 B4GALT7	GO:0006487	protein N-linked glycosylation	1	0.0352972
2	269	46	20563	0.0222241	REG3A CRTAM	GO:0007157	heterophilic cell-cell adhesion via plasma membrane cell adhesion molecules	1	0.0352972
2	269	46	20563	0.0222241	IL18BP DKK3	GO:2000272	negative regulation of signaling receptor activity	1	0.0352972
2	269	47	20563	0.0235155	TRA2B LMNB2	GO:0005637	nuclear inner membrane	1	0.0369599
2	269	47	20563	0.0235155	EPHB2 PLXNC1	GO:0007162	negative regulation of cell adhesion	1	0.0369599
2	269	47	20563	0.0235155	ACAT1 TP53I13	GO:0014070	response to organic cyclic compound	1	0.0369599
2	269	47	20563	0.0235155	BMP4 HSPA9	GO:0030218	erythrocyte differentiation	1	0.0369599
2	269	47	20563	0.0235155	REG1A SORD	GO:0031667	response to nutrient levels	1	0.0369599
9	269	369	20563	0.0239754	ACAT1 GBP1 GOT2 HSPA1A HSPA8 HSPD1 POR PRTN3 YWHAE	GO:0019899	enzyme binding	1	0.0376045
14	269	649	20563	0.024301	CRK FKBP4 GCHFR GDI1 GOT2 HSPA1A HSPD1 PTPN11 REG1A TRA2B ST13 PRDX3 VSIG4 EPS8L2	GO:0032991	protein-containing complex	1	0.0380363
2	269	48	20563	0.0248467	HBEGF PTPN11	GO:0007173	epidermal growth factor receptor signaling pathway	1	0.0387302
2	269	48	20563	0.0248467	ANXA2 CRK	GO:0008092	cytoskeletal protein binding	1	0.0387302
15	269	710	20563	0.0250601	AMY2A ANXA2 NCAN F9 MGMT PNLIPRP1 PRKCSH PRSS2 PRSS3 S100A12 TLL1 EHD2 SVEP1 REG4 PLA2G12B	GO:0005509	calcium ion binding	1	0.038982
4	269	126	20563	0.0251114	FAS GCHFR ST13 YAP1	GO:0065003	protein-containing complex assembly	1	0.038982
5	269	171	20563	0.0252468	DLD MPO NFE2L2 TNFRSF1B HTRA2	GO:0007568	aging	1	0.0391118
2	269	49	20563	0.0262178	FSCN1 PARVA	GO:0007163	establishment or maintenance of cell polarity	1	0.040286
2	269	49	20563	0.0262178	BMP4 GDF15	GO:0010862	positive regulation of pathway-restricted SMAD protein phosphorylation	1	0.040286
2	269	49	20563	0.0262178	HSPD1 OXCT1	GO:0014823	response to activity	1	0.040286
2	269	49	20563	0.0262178	CD8A HSPD1	GO:0042110	T cell activation	1	0.040286
3	269	86	20563	0.0263841	ANXA2 COL2A1 COL5A1	GO:0005604	basement membrane	1	0.0404592
2	269	50	20563	0.0276288	WNT5A FSTL3	GO:0030514	negative regulation of BMP signaling pathway	1	0.0421967
2	269	50	20563	0.0276288	MMP2 PDGFD	GO:0071230	cellular response to amino acid stimulus	1	0.0421967
4	269	131	20563	0.0290583	COL2A1 NCAN PRDX1 TLL1	GO:0001501	skeletal system development	1	0.0442335
2	269	51	20563	0.0290794	BMP4 WNT5A	GO:0042733	embryonic digit morphogenesis	1	0.0442335
3	269	89	20563	0.0294407	AGER WNT5A FZD7	GO:0046330	positive regulation of JNK cascade	1	0.0446931
4	269	132	20563	0.0298921	PRDX1 THPO TXNRD1 YAP1	GO:0008283	cell population proliferation	1	0.0452874
3	269	90	20563	0.0305042	HBEGF CXCL10 TAGLN	GO:0007517	muscle organ development	1	0.0461223
2	269	52	20563	0.0305697	COL2A1 EPHB2	GO:0042472	inner ear morphogenesis	1	0.0461291
6	269	228	20563	0.0308442	CD33 CXCL10 CXCL9 PDGFA XCL1 GDF15	GO:0007267	cell-cell signaling	1	0.0464507
3	269	91	20563	0.0315901	ELANE MMP1 HTRA2	GO:0008233	peptidase activity	1	0.0473852
3	269	91	20563	0.0315901	CD33 OLR1 TNFRSF1B	GO:0035579	specific granule membrane	1	0.0473852
2	269	53	20563	0.0320995	CXCL9 FCMR	GO:0006968	cellular defense response	1	0.0478643
2	269	53	20563	0.0320995	FAS TNFRSF1B	GO:0033209	tumor necrosis factor-mediated signaling pathway	1	0.0478643
2	269	53	20563	0.0320995	PDCD5 HTRA2	GO:0043280	positive regulation of cysteine-type endopeptidase activity involved in apoptotic process	1	0.0478643
3	269	92	20563	0.0326985	B2M FZD7 EHD2	GO:0055038	recycling endosome membrane	1	0.0486616
7	269	283	20563	0.033286	B2M HSPD1 MGMT OTC OXCT1 POR SORD	GO:0009410	response to xenobiotic stimulus	1	0.0494385
2	269	54	20563	0.0336687	CHI3L1 MPO	GO:0009612	response to mechanical stimulus	1	0.049617
2	269	54	20563	0.0336687	WNT5A YAP1	GO:0030216	keratinocyte differentiation	1	0.049617
2	269	54	20563	0.0336687	BIK MMP1	GO:0031334	positive regulation of protein-containing complex assembly	1	0.049617
2	269	54	20563	0.0336687	WNT5A YAP1	GO:0045599	negative regulation of fat cell differentiation	1	0.049617
3	269	95	20563	0.0361591	FUT8 ITGB7 PTPN11	GO:0007229	integrin-mediated signaling pathway	1	0.0531834
2	269	56	20563	0.0369245	ACO1 MAGOH	GO:0006417	regulation of translation	1	0.053786
2	269	56	20563	0.0369245	PGM5 HTRA2	GO:0009898	cytoplasmic side of plasma membrane	1	0.053786
2	269	56	20563	0.0369245	TNFRSF1B HTRA2	GO:0071363	cellular response to growth factor stimulus	1	0.053786
2	269	56	20563	0.0369245	TNFRSF1B HTRA2	GO:1901215	negative regulation of neuron death	1	0.053786
2	269	56	20563	0.0369245	EPHB2 WNK3	GO:1903078	positive regulation of protein localization to plasma membrane	1	0.053786
2	269	57	20563	0.0386108	S100A12 LOXL3	GO:0005507	copper ion binding	1	0.0560264
2	269	57	20563	0.0386108	GFAP SERPINE2	GO:0060291	long-term synaptic potentiation	1	0.0560264
4	269	142	20563	0.0390609	COL5A1 GFAP ICAM4 ITGB7	GO:0005178	integrin binding	1	0.056571
3	269	98	20563	0.0398233	HSPA1A ITGB7 HAVCR1	GO:0046718	viral entry into host cell	1	0.0575649
5	269	192	20563	0.0409232	AGER OLR1 CD163 EHD2 LOXL3	GO:0006897	endocytosis	1	0.0590419
4	269	144	20563	0.0410788	HSPA1A HSPA8 KRT1 PRSS1	GO:0072562	blood microparticle	1	0.0590572
3	269	99	20563	0.04109	BIK WNT5A FSTL3	GO:0008584	male gonad development	1	0.0590572
6	269	244	20563	0.04202	COL5A1 CRK FUT8 ITGB7 L1CAM FSCN1	GO:0016477	cell migration	1	0.060165
6	269	244	20563	0.04202	HBEGF EPHA1 EPHB2 PDGFA RDX PDGFD	GO:0030335	positive regulation of cell migration	1	0.060165
7	269	297	20563	0.0422647	CRK HSPA1A HSPA8 HSPA9 HSPD1 TNFRSF1B YWHAE	GO:0031625	ubiquitin protein ligase binding	1	0.060401
20	269	1074	20563	0.0436775	FAS CD33 CLIC2 CRK HBEGF GDI1 GFER SFN CXCL10 CXCL9 REG1A XCL1 TFF1 TXNRD1 YWHAE MANF GDF15 CLEC1B CCL28 SCGB3A1	GO:0007165	signal transduction	1	0.0620353
2	269	60	20563	0.0439006	MAGOH TRA2B	GO:0000381	regulation of alternative mRNA splicing, via spliceosome	1	0.0620353
2	269	60	20563	0.0439006	BMP4 FSTL3	GO:0002244	hematopoietic progenitor cell differentiation	1	0.0620353
2	269	60	20563	0.0439006	COL2A1 FCN1	GO:0005581	collagen trimer	1	0.0620353
2	269	60	20563	0.0439006	BMP4 YAP1	GO:0050679	positive regulation of epithelial cell proliferation	1	0.0620353
2	269	60	20563	0.0439006	UBE2E1 UBE2E3	GO:0070936	protein K48-linked ubiquitination	1	0.0620353
2	269	61	20563	0.0457401	PDCD1 EBI3	GO:0006959	humoral immune response	1	0.0643939
2	269	61	20563	0.0457401	BMP4 GDF15	GO:0060395	SMAD protein signal transduction	1	0.0643939
4	269	149	20563	0.0463956	BMP4 PDGFA THPO GDF15	GO:0043410	positive regulation of MAPK cascade	1	0.0651953
2	269	62	20563	0.0476173	ELANE PRTN3	GO:0006909	phagocytosis	1	0.0664183
2	269	62	20563	0.0476173	ACO1 BMP4	GO:0009791	post-embryonic development	1	0.0664183
2	269	62	20563	0.0476173	AGER WNT5A	GO:0032731	positive regulation of interleukin-1 beta production	1	0.0664183
2	269	62	20563	0.0476173	AGXT HSPD1	GO:0051384	response to glucocorticoid	1	0.0664183
2	269	63	20563	0.0495319	ITPA NAXE	GO:0000166	nucleotide binding	1	0.0688348
2	269	63	20563	0.0495319	EHD2 DPY30	GO:0016197	endosomal transport	1	0.0688348

## Sheet: Prot_GSEA_msigdb.h
SigGeneNumInGroup	SigGeneNum	GeneNumInGroup	GeneNumInDB	Pvalue	Gene	item.ID	item.name	bonferroni	fdr
10	145	87	4383	0.000114653	IL1R1 REG1A IL15RA EBI3 TNFRSF1B FAS CXCL10 CXCL3 PTPN11 CXCL9	HALLMARK_IL6_JAK_STAT3_SIGNALING	HALLMARK_IL6_JAK_STAT3_SIGNALING	0.00481542	0.00240771
16	145	200	4383	0.000270153	ATP5PF CS DLD MDH1 MDH2 ACADVL DECR1 GOT2 ECHS1 ACAT1 ACAA1 HSPA9 POR PRDX3 HTRA2 GRPEL1	HALLMARK_OXIDATIVE_PHOSPHORYLATION	HALLMARK_OXIDATIVE_PHOSPHORYLATION	0.0113464	0.00378214
14	145	200	4383	0.00226576	DECR1 ECHS1 CS GRPEL1 AK2 HIBCH ALDH2 DLD OMD G3BP2 COQ9 MDH2 PRDX3 POR	HALLMARK_ADIPOGENESIS	HALLMARK_ADIPOGENESIS	0.0951619	0.0237905
13	145	200	4383	0.00589814	B4GALT7 AKR1A1 MDH2 MDH1 ME2 GOT2 FUT8 UGP2 COL5A1 BIK BPNT1 DLD FKBP4	HALLMARK_GLYCOLYSIS	HALLMARK_GLYCOLYSIS	0.247722	0.0495444
12	145	200	4383	0.014246	ADH1C POR SERPINE1 ALDH2 HSD11B1 FBP1 TKFC SHMT2 IL1R1 PTGR1 FAS REG1A	HALLMARK_XENOBIOTIC_METABOLISM	HALLMARK_XENOBIOTIC_METABOLISM	0.598331	0.0997219
11	145	200	4383	0.031828	COL5A1 SERPINE1 TAGLN MMP2 FSTL3 WNT5A SERPINE2 FMOD PRSS2 MMP1 FAS	HALLMARK_EPITHELIAL_MESENCHYMAL_TRANSITION	HALLMARK_EPITHELIAL_MESENCHYMAL_TRANSITION	1	0.190968
4	145	58	4383	0.041608	HSPD1 HSPE1 DCTPP1 SORD	HALLMARK_MYC_TARGETS_V2	HALLMARK_MYC_TARGETS_V2	1	0.218442

## Sheet: Prot_GSEA_ReactomePathways
SigGeneNumInGroup	SigGeneNum	GeneNumInGroup	GeneNumInDB	Pvalue	Gene	item.ID	item.name	bonferroni	fdr
3	128	13	6231	0.000105234	AGER PRKCSH S100A12	Advancedglycosylationendproductreceptorsignaling	Advanced glycosylation endproduct receptor signaling	0.0222045	0.00185037
3	128	14	6231	0.000144993	ACADVL DECR1 ECHS1	MitochondrialFattyAcidBeta-Oxidation	Mitochondrial Fatty Acid Beta-Oxidation	0.0305935	0.00235334
6	128	62	6231	0.000251876	FBP1 GOT2 MDH1 MDH2 PKLR UGP2	Glucosemetabolism	Glucose metabolism	0.0531459	0.00379614
2	128	7	6231	0.000279046	CKMT1A GATM	Creatinemetabolism	Creatine metabolism	0.0588786	0.00392524
3	128	17	6231	0.000328621	ACAT1 DLD HIBCH	Branched-chainaminoacidcatabolism	Branched-chain amino acid catabolism	0.069339	0.00407877
3	128	17	6231	0.000328621	AK2 RRM2B TXNRD1	Synthesisandinterconversionofnucleotidedi-andtriphosphates	Synthesis and interconversion of nucleotide di- and triphosphates	0.069339	0.00407877
4	128	31	6231	0.000374321	FBP1 GOT2 MDH1 MDH2	Gluconeogenesis	Gluconeogenesis	0.0789817	0.00438787
2	128	8	6231	0.000439776	AMY2A AMY2B	Digestionofdietarycarbohydrate	Digestion of dietary carbohydrate	0.0927928	0.00463964
2	128	8	6231	0.000439776	ACADVL ECHS1	mitochondrialfattyacidbeta-oxidationofsaturatedfattyacids	mitochondrial fatty acid beta-oxidation of saturated fatty acids	0.0927928	0.00463964
3	128	19	6231	0.000518393	CS DLD MDH2	Citricacidcycle(TCAcycle)	Citric acid cycle (TCA cycle)	0.109381	0.00520862
5	128	52	6231	0.000627243	CS GFER GRPEL1 HSPA9 HSPD1	MitochondrialProteinImport	Mitochondrial Protein Import	0.132348	0.00596102
2	128	9	6231	0.000649779	PRSS2 PRSS3	Alpha-defensins	Alpha-defensins	0.137103	0.00596102
2	128	10	6231	0.000914359	ADH1C ALDH2	Ethanoloxidation	Ethanol oxidation	0.19293	0.00771719
2	128	10	6231	0.000914359	PTPN11 UNC5B	Netrinmediatedrepulsionsignals	Netrin mediated repulsion signals	0.19293	0.00771719
12	128	236	6231	0.001043	AMY2A AMY2B B4GALT7 FBP1 FMOD GOT2 MDH1 MDH2 NCAN OMD PKLR UGP2	Metabolismofcarbohydrates	Metabolism of carbohydrates	0.220072	0.00846432
2	128	11	6231	0.00123844	FMOD OMD	Keratansulfatedegradation	Keratan sulfate degradation	0.26131	0.00942365
4	128	40	6231	0.00125053	GFAP HBEGF PTPN11 YAP1	NuclearsignalingbyERBB4	Nuclear signaling by ERBB4	0.263862	0.00942365
3	128	28	6231	0.00237363	AP2A2 L1CAM RDX	RecyclingpathwayofL1	Recycling pathway of L1	0.500835	0.0172702
5	128	70	6231	0.00299064	AK2 GMPS NT5C RRM2B TXNRD1	Metabolismofnucleotides	Metabolism of nucleotides	0.631026	0.0207442
6	128	94	6231	0.00304773	AP2A2 CNTN1 EPHB2 L1CAM NCAN RDX	L1CAMinteractions	L1CAM interactions	0.64307	0.0207442
2	128	16	6231	0.00389892	GOT2 PSAT1	Aminoacidsynthesisandinterconversion(transamination)	Amino acid synthesis and interconversion (transamination)	0.822672	0.0257085
2	128	17	6231	0.00466399	MMP1 MMP2	RegulationofInsulin-likeGrowthFactor(IGF)ActivitybyInsulin-likeGrowthFactorBindingProteins(IGFBPs)	Regulation of Insulin-like Growth Factor (IGF) Activity by Insulin-like Growth Factor Binding Proteins (IGFBPs)	0.984101	0.0298212
3	128	36	6231	0.00601786	AKR1B1 HSD11B1 PNLIP	MetabolismofsteroidhormonesandvitaminsAandD	Metabolism of steroid hormones and vitamins A and D	1	0.0373461
2	128	19	6231	0.00645022	AGER S100A12	RIP-mediatedNFkBactivationviaDAI	RIP-mediated NFkB activation via DAI	1	0.0388856
2	128	20	6231	0.00747595	YAP1 YWHAE	SignalingbyHippo	Signaling by Hippo	1	0.0438174
11	128	266	6231	0.00821486	AP2A2 CNTN1 COL2A1 COL5A1 EPHB2 L1CAM NCAN PLXNC1 PTPN11 RDX UNC5B	Axonguidance	Axon guidance	1	0.0462452
2	128	21	6231	0.00859271	AGER S100A12	DAImediatedinductionoftypeIIFNs	DAI mediated induction of type I IFNs	1	0.0462452
2	128	21	6231	0.00859271	AP2A2 B2M	Nef-mediatesdownmodulationofcellsurfacereceptorsbyrecruitingthemtoclathrinadapters	Nef-mediates down modulation of cell surface receptors by recruiting them to clathrin adapters	1	0.0462452
3	128	40	6231	0.00876687	CS DLD MDH2	PyruvatemetabolismandCitricAcid(TCA)cycle	Pyruvate metabolism and Citric Acid (TCA) cycle	1	0.0462452
8	128	174	6231	0.00928809	ACADVL ACAT1 DECR1 ECHS1 HMGCS2 OXCT1 TXNRD1 YAP1	Fattyacid,triacylglycerol,andketonebodymetabolism	Fatty acid, triacylglycerol, and ketone body metabolism	1	0.0477997
2	128	22	6231	0.00980218	AGER S100A12	TRAF6mediatedNF-kBactivation	TRAF6 mediated NF-kB activation	1	0.0492443
2	128	23	6231	0.0111058	AGER S100A12	Cytosolicsensorsofpathogen-associatedDNA	Cytosolic sensors of pathogen-associated DNA	1	0.054496
3	128	44	6231	0.0122297	COL2A1 COL5A1 NCAN	NCAM1interactions	NCAM1 interactions	1	0.0586339
2	128	24	6231	0.0125049	AGER S100A12	TAK1activatesNFkBbyphosphorylationandactivationofIKKscomplex	TAK1 activates NFkB by phosphorylation and activation of IKKs complex	1	0.0586339
4	128	69	6231	0.013321	B2M GBP1 GBP2 PTPN11	Interferongammasignaling	Interferon gamma signaling	1	0.0611028
2	128	25	6231	0.0140003	L1CAM MMP1	Basigininteractions	Basigin interactions	1	0.0628526
2	128	26	6231	0.0155931	B4GALT7 NCAN	AtetrasaccharidelinkersequenceisrequiredforGAGsynthesis	A tetrasaccharide linker sequence is required for GAG synthesis	1	0.0685448
2	128	27	6231	0.0172839	FMOD OMD	Keratansulfatebiosynthesis	Keratan sulfate biosynthesis	1	0.0744266
2	128	28	6231	0.0190731	PDCD1 PTPN11	PD-1signaling	PD-1 signaling	1	0.0773929
2	128	28	6231	0.0190731	F9 SUMF2	PTM:gammacarboxylation,hypusineformationandarylsulfataseactivation	PTM: gamma carboxylation, hypusine formation and arylsulfatase activation	1	0.0773929
2	128	28	6231	0.0190731	AP2A2 B2M	TheroleofNefinHIV-1replicationanddiseasepathogenesis	The role of Nef in HIV-1 replication and disease pathogenesis	1	0.0773929
2	128	29	6231	0.0209612	AKR1B1 HSD11B1	Steroidhormones	Steroid hormones	1	0.0834492
3	128	54	6231	0.0243698	HSPA1A HSPA8 PSMA7	DestabilizationofmRNAbyAUF1(hnRNPD0)	Destabilization of mRNA by AUF1 (hnRNP D0)	1	0.0952227
2	128	31	6231	0.0250342	FMOD OMD	Keratansulfate/keratinmetabolism	Keratan sulfate/keratin metabolism	1	0.0960404
2	128	33	6231	0.0295028	GMPS NT5C	Purinemetabolism	Purine metabolism	1	0.111162
4	128	85	6231	0.0300478	COL2A1 CRK ICAM4 ITGB7	Integrincellsurfaceinteractions	Integrin cell surface interactions	1	0.11123
2	128	34	6231	0.0318847	MAGOH NUDT21	Post-ElongationProcessingofIntron-Containingpre-mRNA	Post-Elongation Processing of Intron-Containing pre-mRNA	1	0.114028
2	128	34	6231	0.0318847	MAGOH NUDT21	mRNA3-endprocessing	mRNA 3-end processing	1	0.114028
7	128	182	6231	0.0331999	CCL28 CXCL10 CXCL2 CXCL3 CXCL9 PPBP XCL1	Peptideligand-bindingreceptors	Peptide ligand-binding receptors	1	0.116342
2	128	35	6231	0.0343644	AP2A2 L1CAM	SignaltransductionbyL1	Signal transduction by L1	1	0.116342
7	128	184	6231	0.0350949	COL2A1 COL5A1 CRK HBEGF PDGFA PDGFD PTPN11	SignalingbyPDGF	Signaling by PDGF	1	0.116342
5	128	119	6231	0.0352366	B2M CD8A CRTAM ICAM4 ITGB7	ImmunoregulatoryinteractionsbetweenaLymphoidandanon-Lymphoidcell	Immunoregulatory interactions between a Lymphoid and a non-Lymphoid cell	1	0.116342
16	128	518	6231	0.0352886	ACAA1 ACADVL ACAT1 AKR1B1 AKR1C4 CEL DECR1 ECHS1 HMGCS2 HSD11B1 MVD OXCT1 PNLIP SUMF2 TXNRD1 YAP1	Metabolismoflipidsandlipoproteins	Metabolism of lipids and lipoproteins	1	0.116342
2	128	37	6231	0.0396149	CRK THPO	PlateletAggregation(PlugFormation)	Platelet Aggregation (Plug Formation)	1	0.128596
3	128	64	6231	0.0419254	COL2A1 COL5A1 TLL1	Collagenbiosynthesisandmodifyingenzymes	Collagen biosynthesis and modifying enzymes	1	0.132034
3	128	64	6231	0.0419254	COL2A1 COL5A1 TLL1	Collagenformation	Collagen formation	1	0.132034
4	128	94	6231	0.0435396	L1CAM MMP1 OLR1 PTPN11	Cellsurfaceinteractionsatthevascularwall	Cell surface interactions at the vascular wall	1	0.135101
13	128	420	6231	0.0484804	AP2A2 BOC CNTN1 COL2A1 COL5A1 EPHB2 L1CAM NCAN PKLR PLXNC1 PTPN11 RDX UNC5B	DevelopmentalBiology	Developmental Biology	1	0.148252

## Sheet: metabolome pathway results
	Total	Expected	Hits	Raw p	#NAME?	Holm adjust	FDR	Impact
Purine metabolism	70	0.35176	4	0.0002103	3.6772	0.016824	0.016824	0.03965
Pyrimidine metabolism	39	0.19598	2	0.014921	1.8262	1	0.59685	0.07784
Caffeine metabolism	10	0.050251	1	0.049266	1.3075	1	1	0
Porphyrin metabolism	31	0.15578	1	0.14586	0.83605	1	1	0
