# Supplementary material for: Temporal Integration of Serum Proteomics, Metabolomics and MRI Tumor Volumetrics via Deep Learning Identifies Systemic Mediators of Glioblastoma Response to Chemoradiotherapy
Source: Research Square preprint supplement (doi:10.21203/rs.3.rs-9085743/v1), 2026-03-18
Supplement: Supplementary file 5 [file d1fe2c5495fe1c1331cc1f2b.xlsx]

## Sheet: early change edema
	Edema_Cor	Edema_Pval
PSD2	0.331	0
PCSK1	-0.344	0
SIGLEC7	-0.335	0
PENK	-0.339	0
CPN2	0.345	0
SLAMF8	-0.386	0
PAM	-0.312	0.001
P13612|P05556	-0.324	0.001
CD3E	0.318	0.001
TMEM52B	0.304	0.001
SCARB1	-0.313	0.001
THAP2	0.315	0.001

## Sheet: early change NE
	NE_Tumor_Cor	NE_Tumor_Pval
ARTN	0.375	0
S100A12	0.333	0
KMT2C	0.354	0
FAM50A	0.387	0
ADD2	0.364	0
CXCL5	0.359	0
A4GALT	0.383	0
GLS	0.507	0
EIF3G	0.44	0
CAMK1	0.335	0
GP1BA	0.401	0
GALNT16	-0.361	0
TGFBR2	0.443	0
COL3A1	-0.369	0
SDCBP2	0.461	0
NPEPL1	0.363	0
KCNIP4	0.334	0
SH2D3C	0.343	0
IGFBP7	-0.327	0
SGF29	0.39	0
CHMP6	0.346	0
NADK	0.347	0
HTRA1	-0.357	0
TPMT	0.327	0
BCL2L14	0.348	0
ANTXR2	-0.328	0
FTHL17	0.484	0
EPHB3	0.408	0
HSF2BP	0.489	0
F13B	-0.331	0
TECTB	0.353	0
VPS9D1	0.329	0
FCGRT	-0.305	0.001
BMP5	-0.312	0.001
BMP6	-0.301	0.001
MOCOS	0.324	0.001
FJX1	-0.306	0.001
OAS1	0.311	0.001
TIPIN	0.316	0.001
B3GAT1	-0.314	0.001
BIN3	0.318	0.001
BGN	-0.312	0.001
NR0B2	0.304	0.001
SNTN	0.307	0.001
MRPL38	0.304	0.001
PKN2	0.321	0.001
KLC3	-0.307	0.001
UBE2C	0.305	0.001
RELN	-0.301	0.001
PDCD4	0.312	0.001
CD164L2	0.302	0.001
CASP7	0.313	0.001
PPIL3	0.313	0.001
PENK	-0.308	0.001
SGTB	0.3	0.001
SOX10	0.309	0.001
GJD2	0.313	0.001
C1R	-0.304	0.001
CER1	0.317	0.001
ATAD2	0.302	0.001
GAGE12G	0.3	0.001
SMS	0.31	0.001
BNIP3	0.31	0.001
KI3L3:CD	0.324	0.001
SSU72	0.311	0.001

## Sheet: early change CE
	CE_tumor_Cor	CE_tumor_Pval
L1CAM	-0.359	0
CEL	-0.346	0
RARRES1	-0.35	0
ST6GALNAC6	-0.337	0
PLXNC1	-0.338	0
ST6GAL2	-0.334	0
GAA	-0.366	0
CCL5	-0.346	0
ESAM	-0.332	0
KMT2C	0.372	0
PDYN	-0.395	0
TNFSF13B	-0.342	0
B3GAT1	-0.366	0
MANBA	-0.394	0
MDM1	0.347	0
TPM3	0.342	0
P13612|P05556	-0.358	0
CNTN4	-0.353	0
NDRG1	0.382	0
SNTN	0.364	0
SPINT2	-0.329	0
NAALAD2	-0.329	0
KCNIP4	0.349	0
TNFAIP6	-0.383	0
SPP1	0.341	0
SELENOS	0.344	0
PRPF6	0.374	0
AACS	0.338	0
ADAM22	-0.34	0
SLC6A16	0.337	0
PENK	-0.387	0
LGALS2	-0.348	0
CXCL12	-0.345	0
SPAG7	0.369	0
EGFL6	-0.367	0
CPN2	0.352	0
SLAMF8	-0.43	0
PSMB6	0.367	0
MMGT1	0.376	0
SFRP4	-0.33	0
Q15750|O43318	0.344	0
VAMP8	0.376	0
THAP2	0.343	0
SYT2	0.348	0
CCL2	-0.35	0
APOM	0.333	0
SPOP	0.344	0
AKT2	0.395	0
RABIF	0.408	0
DEFB106B	0.333	0
DEFB136	-0.334	0
MMP3	0.38	0
KRT19	0.354	0
GFAP	0.3	0.001
SERPINE1	-0.32	0.001
CLEC4C	-0.302	0.001
CTRC	-0.301	0.001
THSD7A	0.307	0.001
FBLN1	-0.316	0.001
EPHB2	-0.307	0.001
GRN	-0.303	0.001
PTK7	-0.302	0.001
RNF13	-0.312	0.001
HS2ST1	-0.306	0.001
MEOX2	0.304	0.001
MRC2	-0.302	0.001
KLHL14	0.312	0.001
PAM	-0.316	0.001
TNFSF10	0.318	0.001
ADAM8	-0.306	0.001
ROBO2	-0.31	0.001
NCF4	0.325	0.001
TGFBR2	0.302	0.001
TNFRSF10A	0.303	0.001
DNAJC10	-0.32	0.001
NEFH	0.318	0.001
BUD31	0.314	0.001
POGLUT2	0.301	0.001
XXYLT1	-0.308	0.001
EFS	0.32	0.001
LY9	-0.307	0.001
ATXN10	0.309	0.001
C22orf23	0.318	0.001
CHMP6	0.323	0.001
CD164L2	0.318	0.001
PPIL3	0.325	0.001
HNRNPDL	0.301	0.001
DNAI1	0.307	0.001
ENPP3	0.304	0.001
NSF	0.317	0.001
ACVR2B	0.32	0.001
SPATA31D4	0.303	0.001
PLXNB3	-0.307	0.001
RIGI	0.313	0.001
CAV2	0.317	0.001
ARFGAP1	0.324	0.001
PLD3	-0.312	0.001
ATAD2	0.3	0.001
SYT5	0.305	0.001
VGLL4	0.319	0.001
ASPN	-0.316	0.001
CHRDL1	-0.302	0.001
ACP5	0.307	0.001
CBX7	0.304	0.001
GNG12	0.312	0.001
UBA5	0.309	0.001
GNAI1	-0.316	0.001
EYA2	0.305	0.001
ELP1	0.301	0.001
TMCC3	0.305	0.001
NEFL	0.322	0.001
ANOS1	-0.309	0.001

## Sheet: late change edema
	Edema_Cor	Edema_Pval
SORCS1	0.434	0
PRSS57	-0.327	0
EIF1	0.36	0
CBR1	0.328	0
NVL	0.354	0
PSD2	0.417	0
KCTD2	0.338	0
SCARA5	0.404	0
PSMD7	0.349	0
DHX9	0.361	0
ZNF382	0.385	0
GXYLT1	0.327	0
EPHX2	0.355	0
RAB37	0.341	0
PRTN3	-0.314	0.001
THPO	0.311	0.001
EHD2	0.318	0.001
SH3PXD2B	0.311	0.001
PARVA	0.304	0.001
PLXNA1	0.311	0.001
MRC1	0.307	0.001
MILR1	0.304	0.001
HAVCR1	0.319	0.001
ELANE	-0.312	0.001
SPARC	-0.311	0.001
NLGN4X	0.311	0.001
GP5	-0.325	0.001
KLK6	0.314	0.001
ADH1B	0.309	0.001
PPT1	-0.315	0.001
CYB5A	0.302	0.001
TNFRSF12A	0.318	0.001
ZW10	0.308	0.001
SLC26A11	0.303	0.001
CPN2	0.305	0.001
HSPA1L	0.302	0.001
APOM	0.325	0.001
HORMAD2	0.319	0.001
CPLX1	0.31	0.001

## Sheet: late change NE
	NE_Tumor_Cor	NE_Tumor_Pval
PTPN7	0.409	0
GOLPH3	0.35	0
C22orf15	0.327	0
CXCL5	0.334	0
A4GALT	0.337	0
GLS	0.483	0
EIF3G	0.387	0
VILL	0.336	0
TRPT1	0.364	0
GP1BA	0.327	0
TGFBR2	0.348	0
SDCBP2	0.381	0
NPEPL1	0.352	0
TNS2	0.358	0
KCNIP4	0.336	0
UBE2C	0.398	0
SGF29	0.349	0
CHMP6	0.345	0
SOX6	0.395	0
CDYL2	0.333	0
FTHL17	0.386	0
EPHB3	0.392	0
NLRP1	0.328	0
HSF2BP	0.419	0
CER1	0.45	0
KI3L3:CD	0.337	0
FCGRT	-0.301	0.001
CYCS	0.302	0.001
NSMCE1	0.306	0.001
ARTN	0.324	0.001
MB21D2	0.305	0.001
KMT2C	0.306	0.001
FAM50A	0.308	0.001
BTG4	0.317	0.001
CAMK1	0.318	0.001
HYPK	0.304	0.001
SUOX	0.301	0.001
SNTN	0.322	0.001
COL3A1	-0.318	0.001
PCDHGB1	0.301	0.001
ZPBP2	0.316	0.001
NADK	0.324	0.001
RALYL	0.312	0.001
GRAMD2B	0.32	0.001
APOM	0.305	0.001
TECTB	0.308	0.001

## Sheet: late change CE
	CE_tumor_Cor	CE_tumor_Pval
CEL	-0.333	0
GRN	-0.343	0
ST6GAL2	-0.336	0
GAA	-0.365	0
KMT2C	0.33	0
PDYN	-0.351	0
MEOX2	0.367	0
KLHL14	0.328	0
TNFSF10	0.384	0
MANBA	-0.367	0
MDM1	0.382	0
TPM3	0.334	0
P13612|P05556	-0.332	0
NDRG1	0.36	0
EFS	0.349	0
SELENOS	0.362	0
C22orf23	0.338	0
CHMP6	0.351	0
GPC3	-0.34	0
SLC6A16	0.393	0
PENK	-0.356	0
NSF	0.345	0
SPAG7	0.425	0
SLAMF8	-0.361	0
RIGI	0.365	0
PSMB6	0.351	0
PCDHGA2	0.335	0
MMGT1	0.347	0
SYT5	0.341	0
VGLL4	0.34	0
Q15750|O43318	0.35	0
VAMP8	0.35	0
CBX7	0.345	0
UBA5	0.338	0
SYT2	0.385	0
AKT2	0.407	0
RABIF	0.365	0
DEFB136	-0.332	0
ELP1	0.358	0
KRT19	0.333	0
MMP1	-0.305	0.001
L1CAM	-0.315	0.001
RARRES1	-0.311	0.001
THSD7A	0.303	0.001
FBLN1	-0.306	0.001
CTHRC1	-0.307	0.001
PTK7	-0.311	0.001
AP1S2	0.321	0.001
ESAM	-0.319	0.001
PGPEP1	0.3	0.001
PAM	-0.305	0.001
PLXND1	-0.301	0.001
B3GAT1	-0.313	0.001
TNFRSF11A	0.319	0.001
ROBO2	-0.302	0.001
CNTN4	-0.3	0.001
TNFRSF10A	0.3	0.001
MSRB1	0.31	0.001
SKIL	0.301	0.001
BIRC2	0.313	0.001
TNFAIP6	-0.313	0.001
POGLUT2	0.301	0.001
PCP4L1	0.3	0.001
PRPF6	0.319	0.001
AACS	0.319	0.001
CD164L2	0.301	0.001
ADAM22	-0.313	0.001
HNRNPDL	0.321	0.001
DHRS3	0.324	0.001
LGALS2	-0.301	0.001
SCN4B	0.3	0.001
EGFL6	-0.307	0.001
POLR2I	0.305	0.001
SYT1	0.314	0.001
SFRP4	-0.325	0.001
GNG12	0.312	0.001
LEPR	-0.306	0.001
CCL2	-0.309	0.001
APOM	0.309	0.001
TAFA2	0.304	0.001
DEFB106B	0.303	0.001
MMP3	0.324	0.001
NEFL	0.31	0.001

## Sheet: metabolome
	Early change			Late change
	KEGG	Compound	Cor values	KEGG	Compound	Cor values
CE	C00735	CORTISOL+Cl	-0.34
NE	C06413	QUINOLINE	-0.36	C06413	QUINOLINE	-0.31
				CA1444	2-HYDROXYPHENYLACETIC ACID	0.31
Edema	C00257	D-GLUCONATE-H2O	0.32	C00262	HYPOXANTHINE	-0.32

## Sheet: overlapping protein signals
Item	Occurences	Present In
APOM	4	early change CE, late change edema, late change NE, late change CE
CHMP6	4	early change NE, early change CE, late change NE, late change CE
KMT2C	4	early change NE, early change CE, late change NE, late change CE
PENK	4	early change edema, early change NE, early change CE, late change CE
B3GAT1	3	early change NE, early change CE, late change CE
CD164L2	3	early change NE, early change CE, late change CE
CPN2	3	early change edema, early change CE, late change edema
KCNIP4	3	early change NE, early change CE, late change NE
P13612|P05556	3	early change edema, early change CE, late change CE
PAM	3	early change edema, early change CE, late change CE
SLAMF8	3	early change edema, early change CE, late change CE
SNTN	3	early change NE, early change CE, late change NE
TGFBR2	3	early change NE, early change CE, late change NE
A4GALT	2	early change NE, late change NE
AACS	2	early change CE, late change CE
ADAM22	2	early change CE, late change CE
AKT2	2	early change CE, late change CE
ARTN	2	early change NE, late change NE
ATAD2	2	early change NE, early change CE
C22orf23	2	early change CE, late change CE
CAMK1	2	early change NE, late change NE
CBX7	2	early change CE, late change CE
CCL2	2	early change CE, late change CE
CEL	2	early change CE, late change CE
CER1	2	early change NE, late change NE
CNTN4	2	early change CE, late change CE
COL3A1	2	early change NE, late change NE
CXCL5	2	early change NE, late change NE
DEFB106B	2	early change CE, late change CE
DEFB136	2	early change CE, late change CE
EFS	2	early change CE, late change CE
EGFL6	2	early change CE, late change CE
EIF3G	2	early change NE, late change NE
ELP1	2	early change CE, late change CE
EPHB3	2	early change NE, late change NE
ESAM	2	early change CE, late change CE
FAM50A	2	early change NE, late change NE
FBLN1	2	early change CE, late change CE
FCGRT	2	early change NE, late change NE
FTHL17	2	early change NE, late change NE
GAA	2	early change CE, late change CE
GLS	2	early change NE, late change NE
GNG12	2	early change CE, late change CE
GP1BA	2	early change NE, late change NE
GRN	2	early change CE, late change CE
HNRNPDL	2	early change CE, late change CE
HSF2BP	2	early change NE, late change NE
KI3L3:CD	2	early change NE, late change NE
KLHL14	2	early change CE, late change CE
KRT19	2	early change CE, late change CE
L1CAM	2	early change CE, late change CE
LGALS2	2	early change CE, late change CE
MANBA	2	early change CE, late change CE
MDM1	2	early change CE, late change CE
MEOX2	2	early change CE, late change CE
MMGT1	2	early change CE, late change CE
MMP3	2	early change CE, late change CE
NADK	2	early change NE, late change NE
NDRG1	2	early change CE, late change CE
NEFL	2	early change CE, late change CE
NPEPL1	2	early change NE, late change NE
NSF	2	early change CE, late change CE
PDYN	2	early change CE, late change CE
POGLUT2	2	early change CE, late change CE
PPIL3	2	early change NE, early change CE
PRPF6	2	early change CE, late change CE
PSD2	2	early change edema, late change edema
PSMB6	2	early change CE, late change CE
PTK7	2	early change CE, late change CE
Q15750|O43318	2	early change CE, late change CE
RABIF	2	early change CE, late change CE
RARRES1	2	early change CE, late change CE
RIGI	2	early change CE, late change CE
ROBO2	2	early change CE, late change CE
SDCBP2	2	early change NE, late change NE
SELENOS	2	early change CE, late change CE
SFRP4	2	early change CE, late change CE
SGF29	2	early change NE, late change NE
SLC6A16	2	early change CE, late change CE
SPAG7	2	early change CE, late change CE
ST6GAL2	2	early change CE, late change CE
SYT2	2	early change CE, late change CE
SYT5	2	early change CE, late change CE
TECTB	2	early change NE, late change NE
THAP2	2	early change edema, early change CE
THSD7A	2	early change CE, late change CE
TNFAIP6	2	early change CE, late change CE
TNFRSF10A	2	early change CE, late change CE
TNFSF10	2	early change CE, late change CE
TPM3	2	early change CE, late change CE
UBA5	2	early change CE, late change CE
UBE2C	2	early change NE, late change NE
VAMP8	2	early change CE, late change CE
VGLL4	2	early change CE, late change CE
